# Supplementary material for: Molecular networking-guided investigation of the secondary metabolome of four Morus species and their in vivo neuroprotective potential for the mitigation of Alzheimer's disease
Source: Royal Society of Chemistry journal article supplement (doi:10.1039/d3fo05711a), 2024-01-01
Supplement: d3fo05711a1.pdf [file d3fo05711a1.pdf]

## Molecular Networking Guided Investigation of The Secondary Metabolome Of Four *Morus* Species And Their in Vivo Neuroprotective Potential For The Mitigation of Alzheimer's Disease

Nesrine M. Hegazi<sup>a\*</sup>, Tarik A. Mohamed<sup>b</sup>, Abeer Salama<sup>c</sup>, Ahmed R. Hamed<sup>b</sup>, Hamada H. Saad<sup>a,d</sup>, Ibrahim A. Saleh<sup>b</sup>, Eman H. Reda<sup>e</sup>, Ahmed A.A. Elsayed<sup>f</sup>, Mahmoud A. A. Ibrahim<sup>g</sup>, Paul W. Paré<sup>h</sup>, Thomas Efferth<sup>i</sup>, Mohamed-Elamir F. Hegazy<sup>b\*</sup>

<sup>a</sup>Phytochemistry and Plant Systematics Department, National Research Centre, 33 El-Bohouth St., Dokki, Giza 12622, Egypt; [nm.hegazi@nrc.sci.eg](mailto:nm.hegazi@nrc.sci.eg) (N.H.), [hamada.saad@pharm.uni-tuebingen.de](mailto:hamada.saad@pharm.uni-tuebingen.de) (H.H.S)

<sup>b</sup>Chemistry of Medicinal Plants Department, National Research Centre, 33 El-Bohouth St., Dokki, Giza 12622, Egypt; [tarik.nrc83@yahoo.com](mailto:tarik.nrc83@yahoo.com) (T.A.M.); [nragab2004@yahoo.com](mailto:nragab2004@yahoo.com) (A.R.H.); [brahim82@hotmail.com](mailto:brahim82@hotmail.com) (I.A.S.).

<sup>c</sup>Pharmacology Department, National Research Centre, 33 El-Bohouth St., Dokki, Giza 12622, Egypt; [berrotec@yahoo.com](mailto:berrotec@yahoo.com) (A.S.)

<sup>d</sup>Department of Pharmaceutical Biology, Pharmaceutical Institute, Eberhard Karls University of Tübingen, 72074 Tübingen, Germany

<sup>e</sup>Phytochemistry Laboratory, National Organization for Drug Control and Research, Giza 12622, Egypt; [dremanhusseinreda@gmail.com](mailto:dremanhusseinreda@gmail.com) (E.H.R.)

<sup>f</sup>Medicinal and Aromatic Plants Research Department, Pharmaceutical and Drug Industries Research Institute, National Research Centre, 33 El-Bohouth St., Dokki, Giza 12622, Egypt; [ahmedawad\\_888@yahoo.com](mailto:ahmedawad_888@yahoo.com) (A.A.A.E.).

<sup>g</sup>Computational Chemistry Laboratory, Chemistry Department, Faculty of Science, Minia University, Minia 61519, Egypt; [m.ibrahim@compchem.net](mailto:m.ibrahim@compchem.net) (M.A.A.I.).

<sup>h</sup>Department of Chemistry & Biochemistry, Texas Tech University, Lubbock, TX 79409, USA; [paul.pare@ttu.edu](mailto:paul.pare@ttu.edu) (P.W.P.).

<sup>i</sup>Department of Pharmaceutical Biology, Institute of Pharmaceutical and Biomedical Sciences Chemistry, Johannes Gutenberg University, Staudinger Weg 5, 55128 Mainz, Germany; [efferth@uni-mainz.de](mailto:efferth@uni-mainz.de) (T.E.).

Correspondences: [nm.hegazi@nrc.sci.eg](mailto:nm.hegazi@nrc.sci.eg) (N.M.); [efferth@uni-mainz.de](mailto:efferth@uni-mainz.de) (T.E.); [mohegazy@uni-mainz.de](mailto:mohegazy@uni-mainz.de) (M.-E.F.H.)

## Supplementary Figures

Supplementary Figure S1: Base peak chromatogram of the leaves of the studied *Morus* species in both ionization modes

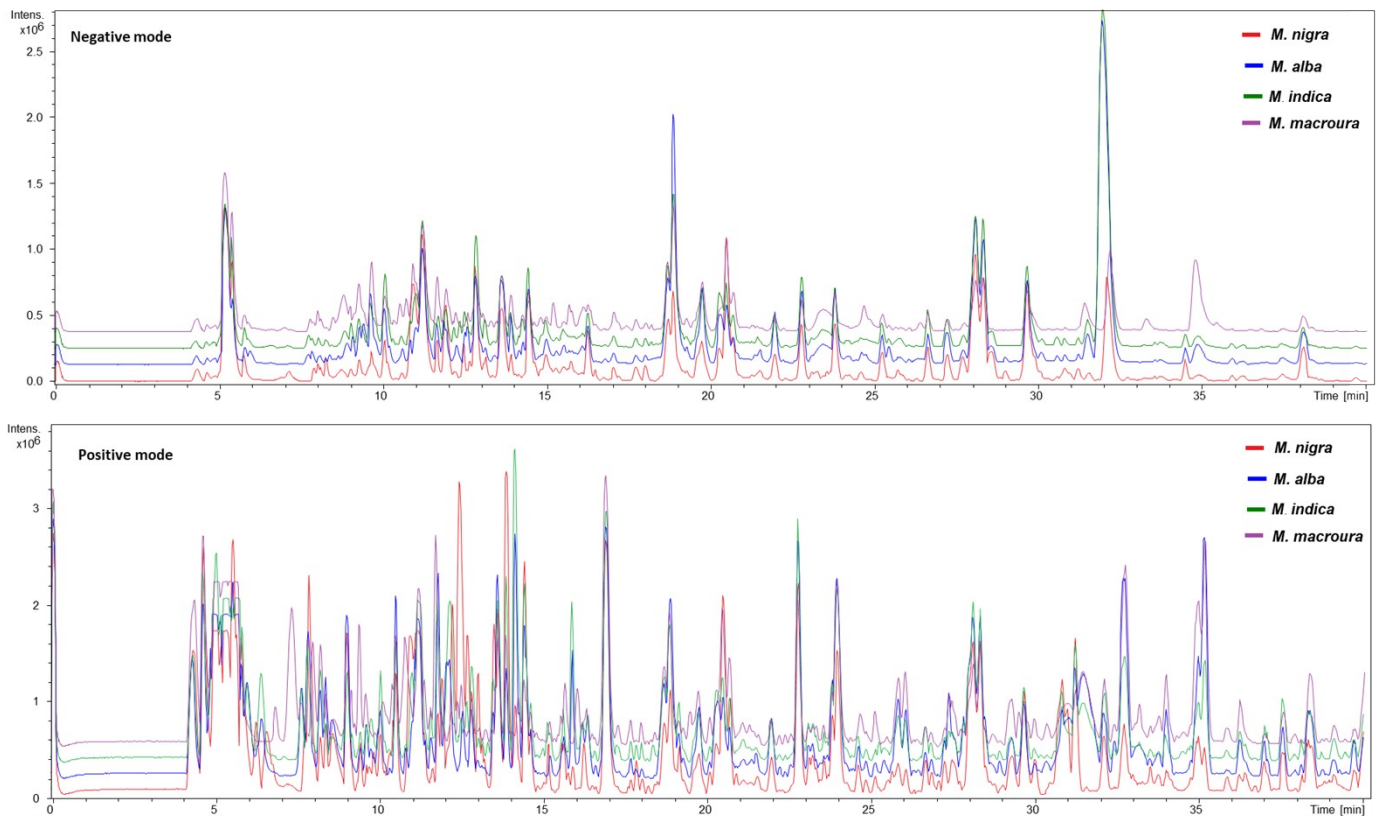

**Supplementary Figure S2: Full FBMN constructed from the acquired UPLC-HRMS/MS data in the negative ionization mode of the leaves of selected *Morus* species.**

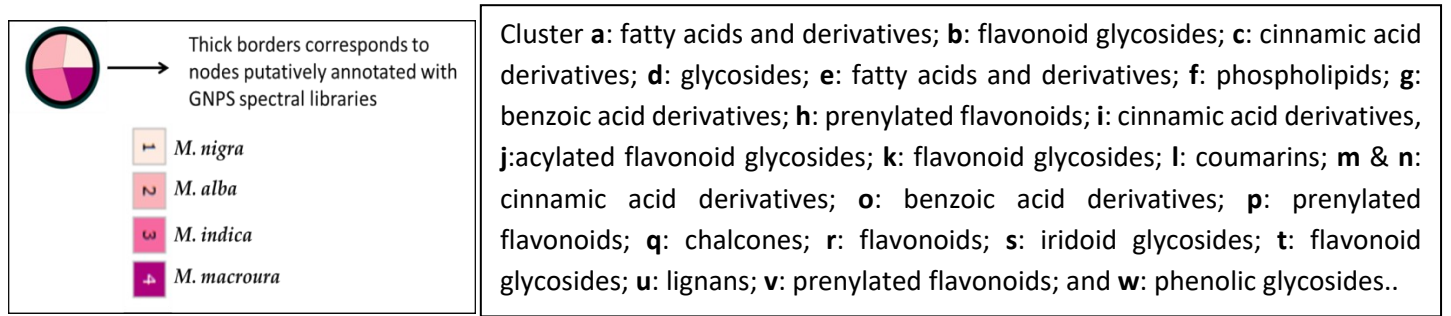

Cluster **a**: fatty acids and derivatives; **b**: flavonoid glycosides; **c**: cinnamic acid derivatives; **d**: glycosides; **e**: fatty acids and derivatives; **f**: phospholipids; **g**: benzoic acid derivatives; **h**: prenylated flavonoids; **i**: cinnamic acid derivatives, **j**: acylated flavonoid glycosides; **k**: flavonoid glycosides; **l**: coumarins; **m & n**: cinnamic acid derivatives; **o**: benzoic acid derivatives; **p**: prenylated flavonoids; **q**: chalcones; **r**: flavonoids; **s**: iridoid glycosides; **t**: flavonoid glycosides; **u**: lignans; **v**: prenylated flavonoids; and **w**: phenolic glycosides..

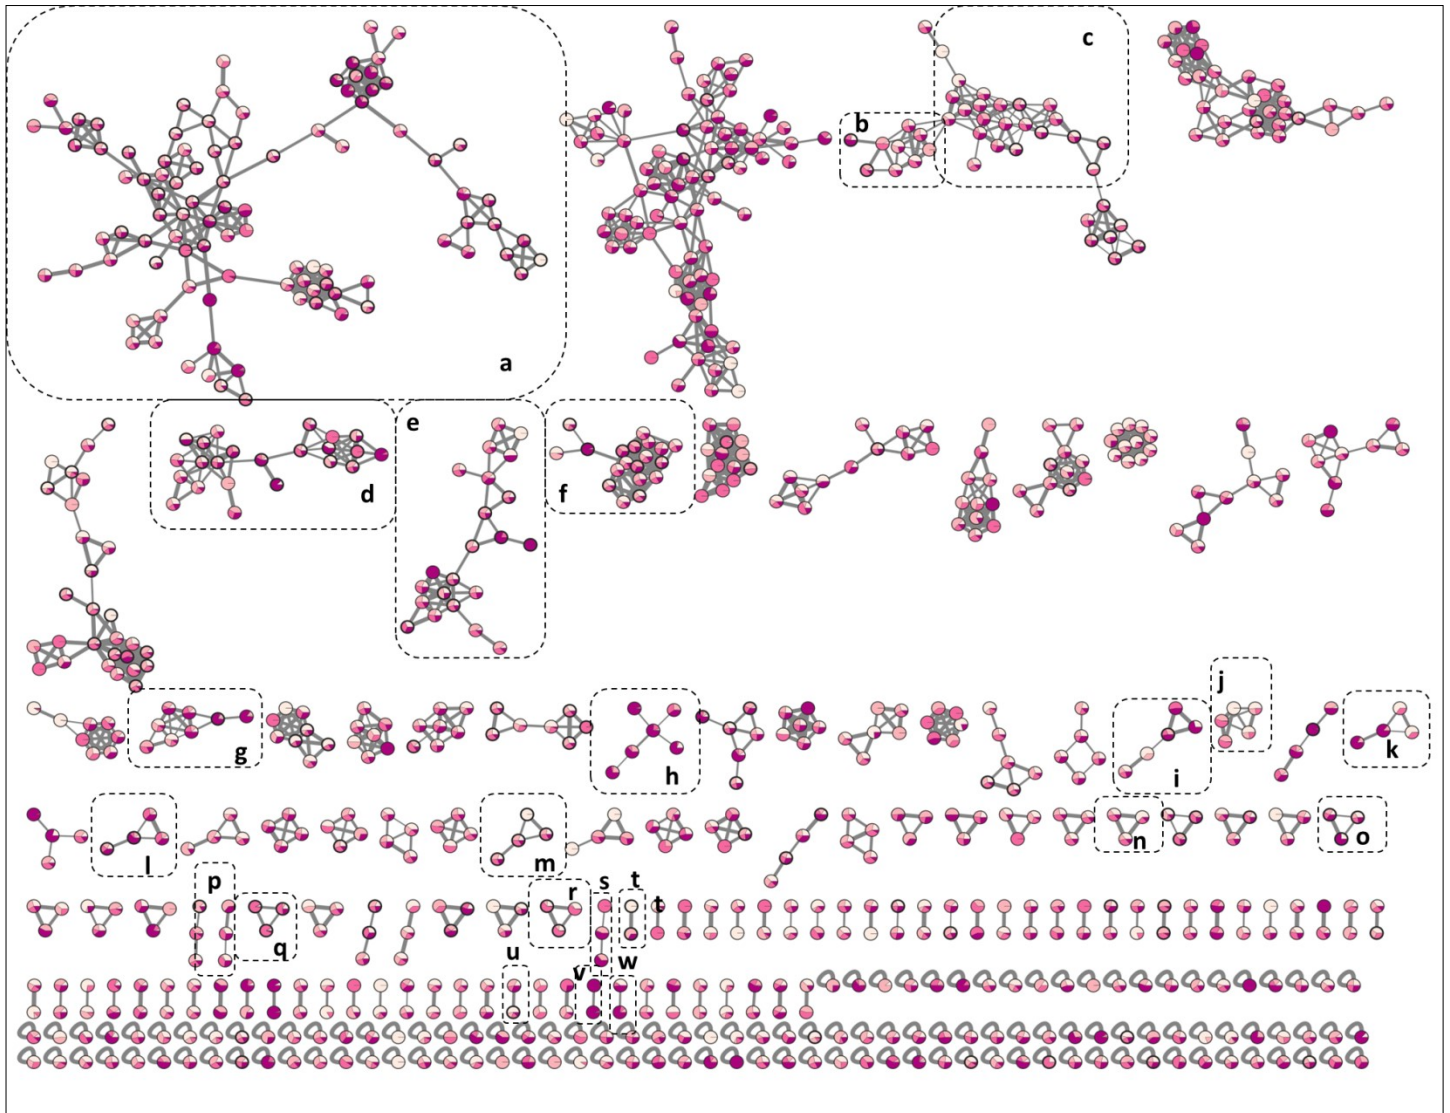

**Supplementary Figure S3: Full FBMN constructed from the acquired UPLC-HRMS/MS data in the positive ionization mode of the leaves of selected *Morus* species.**

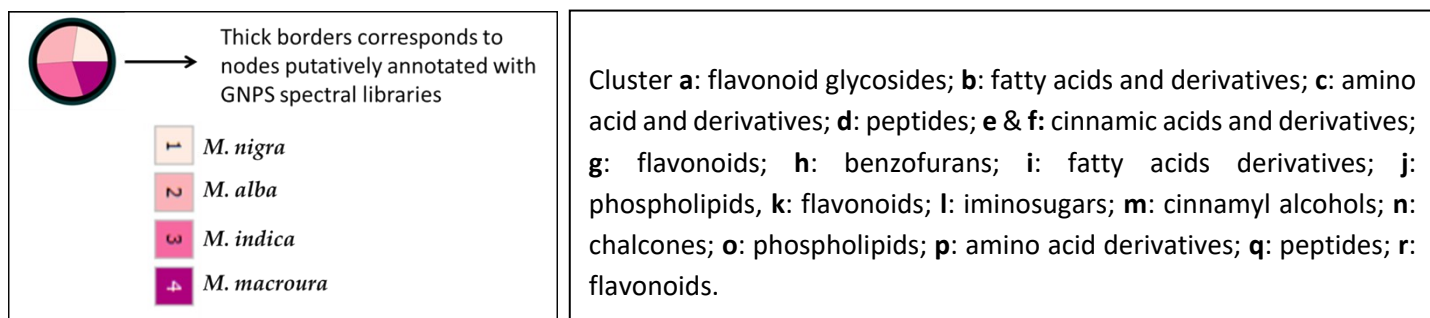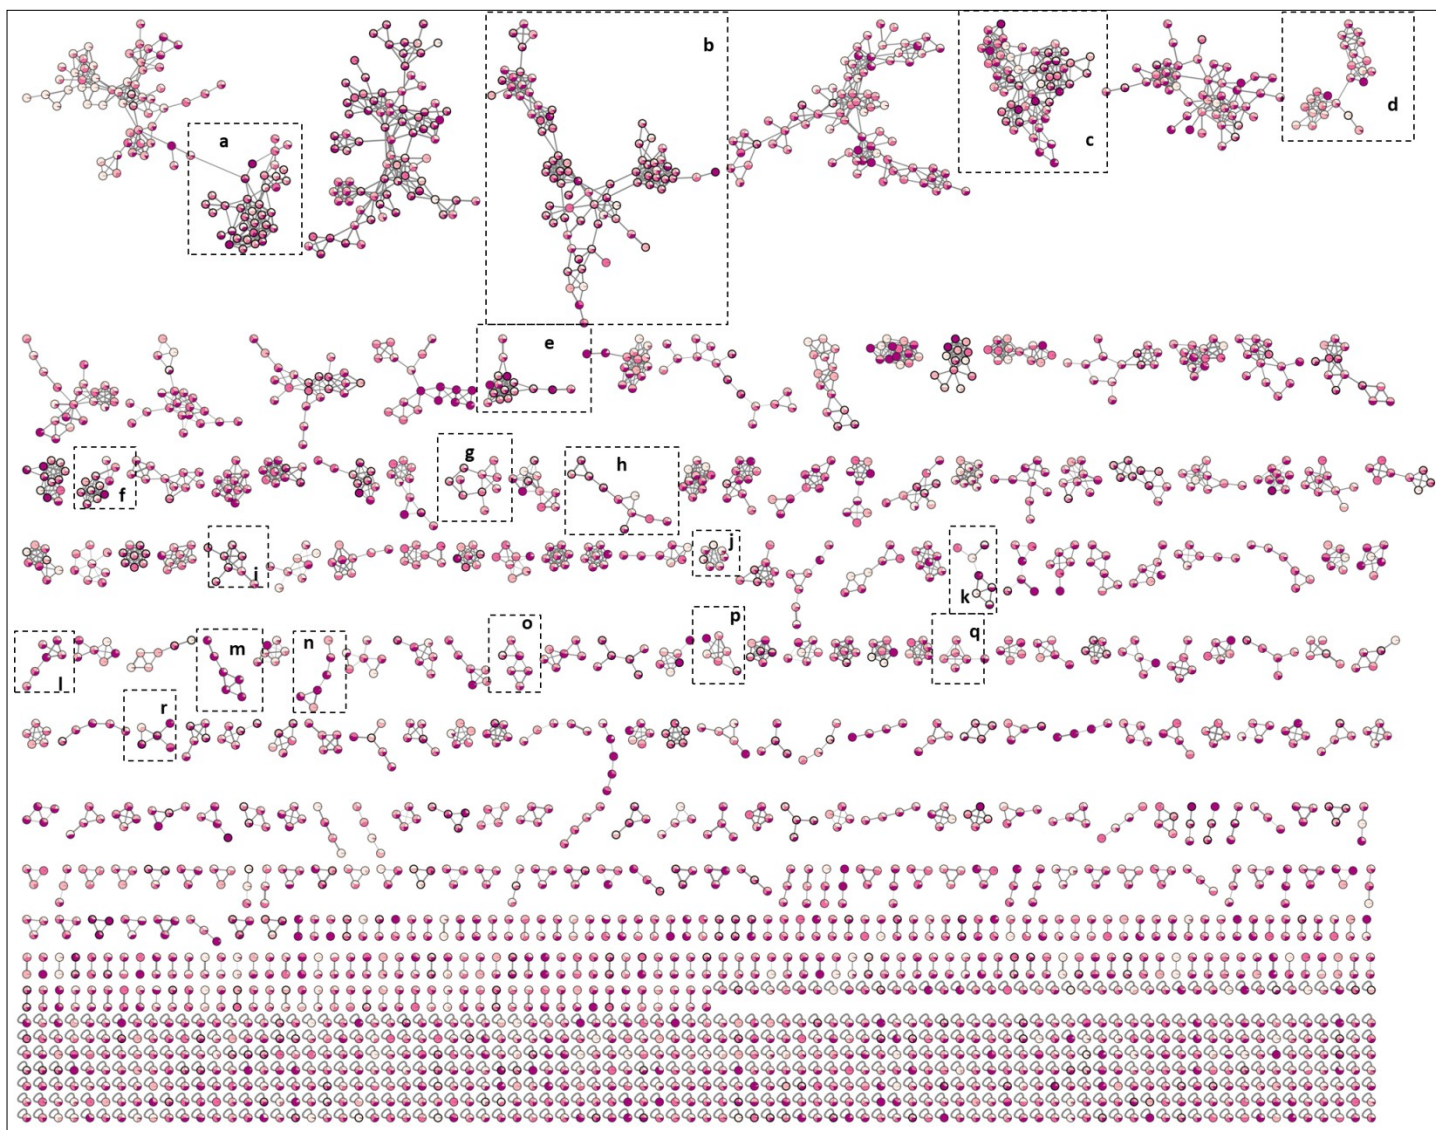

Supplementary Figure S4: MS<sup>2</sup> spectrum of compound 1; moranoline di-*O*-hexoside versus its mono-glycosidic analog 2: moranoline-*O*-hexoside

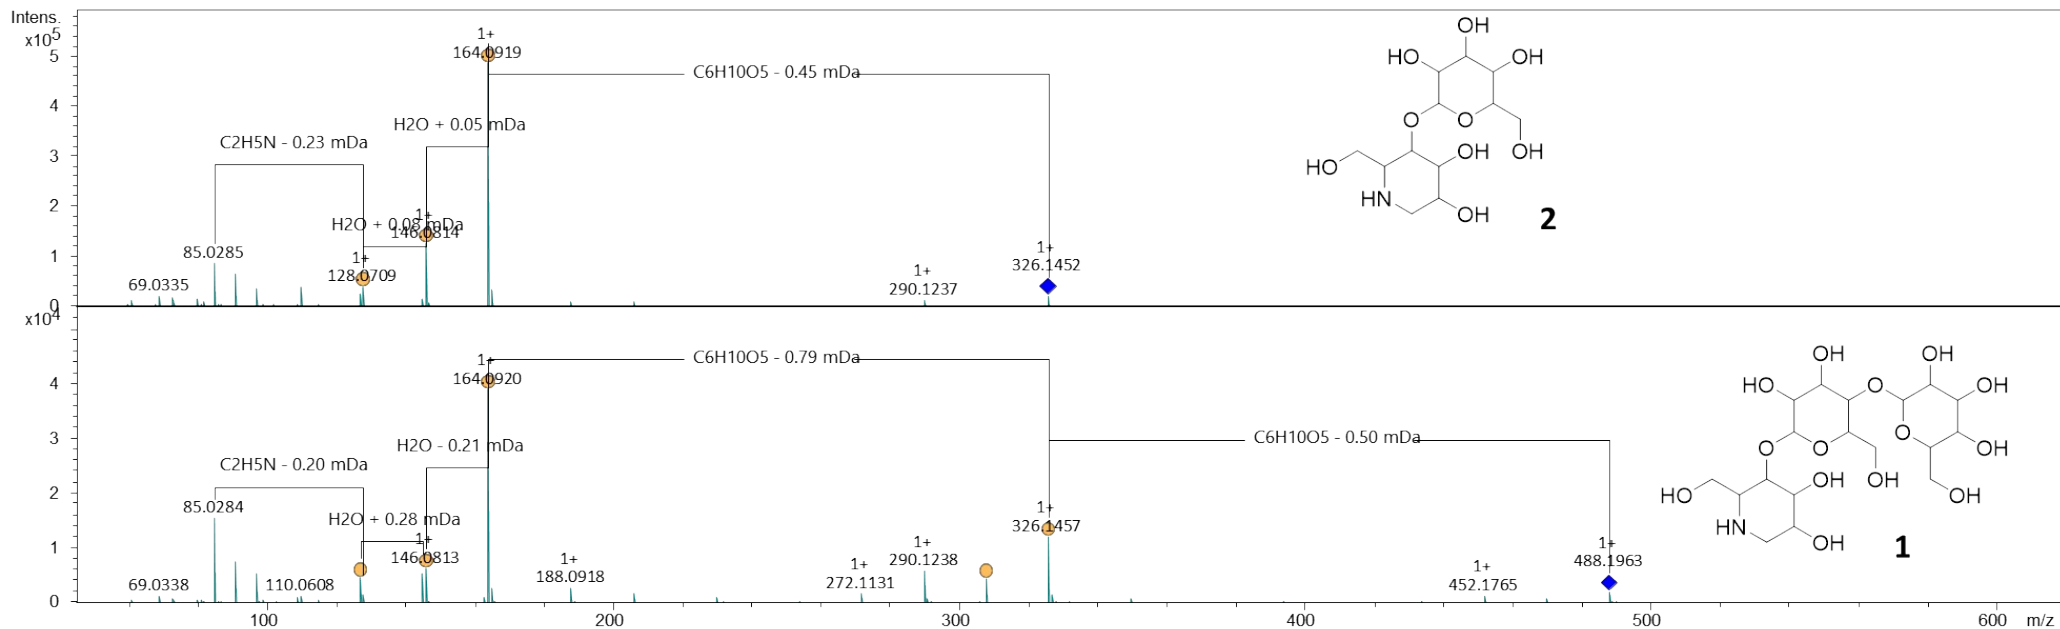

Supplementary Figure S5: MS<sup>2</sup> spectrum of compound 82; (Hydroxydimethoxyphenyl)butenone-*O*-hexoside

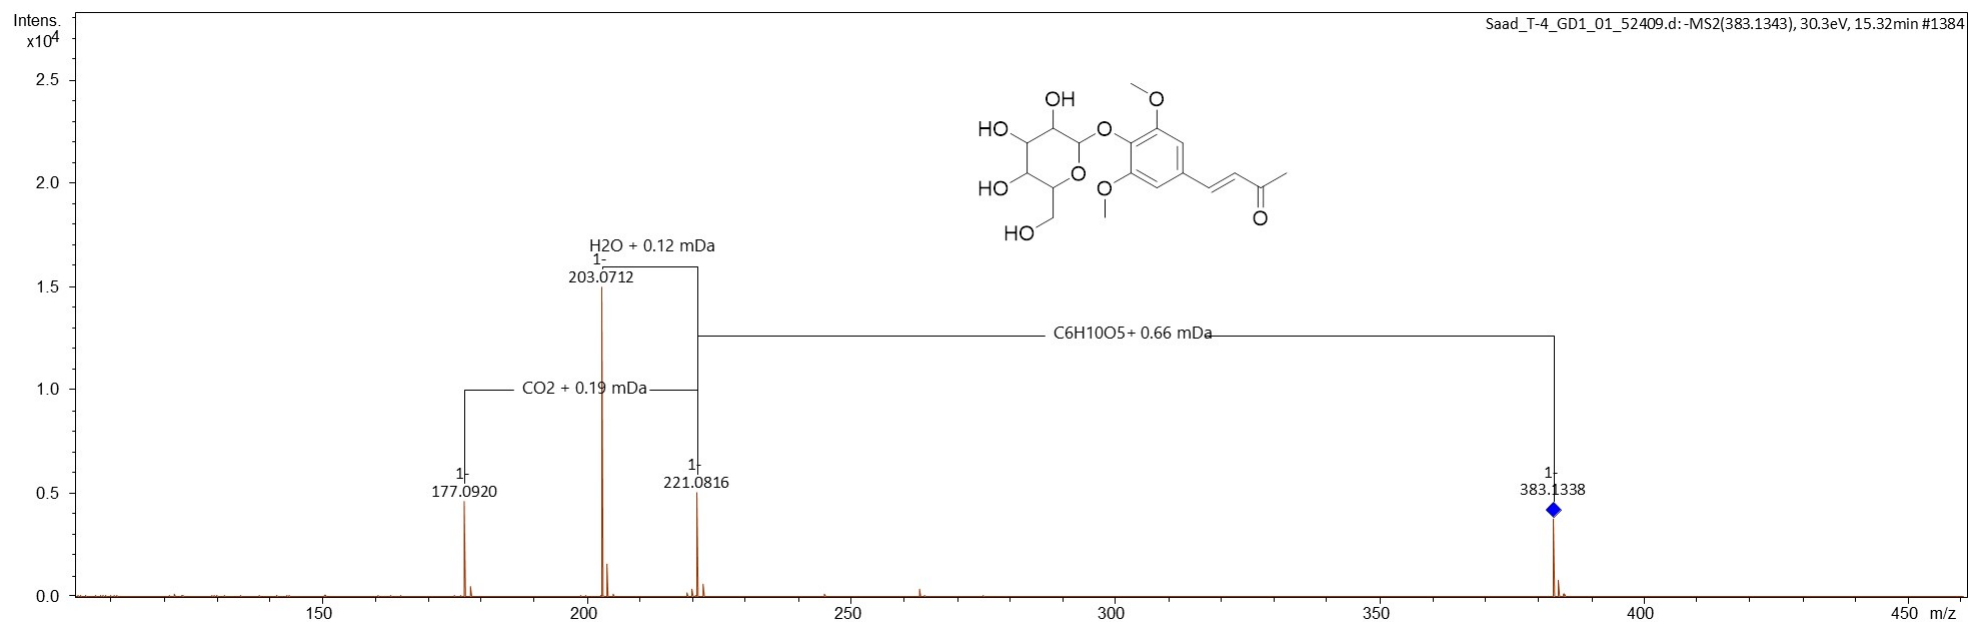

# Supplementary Figure S6: MS<sup>2</sup> spectrum of compound 105; *O*-methylpreglabridin-*O*-sulphate

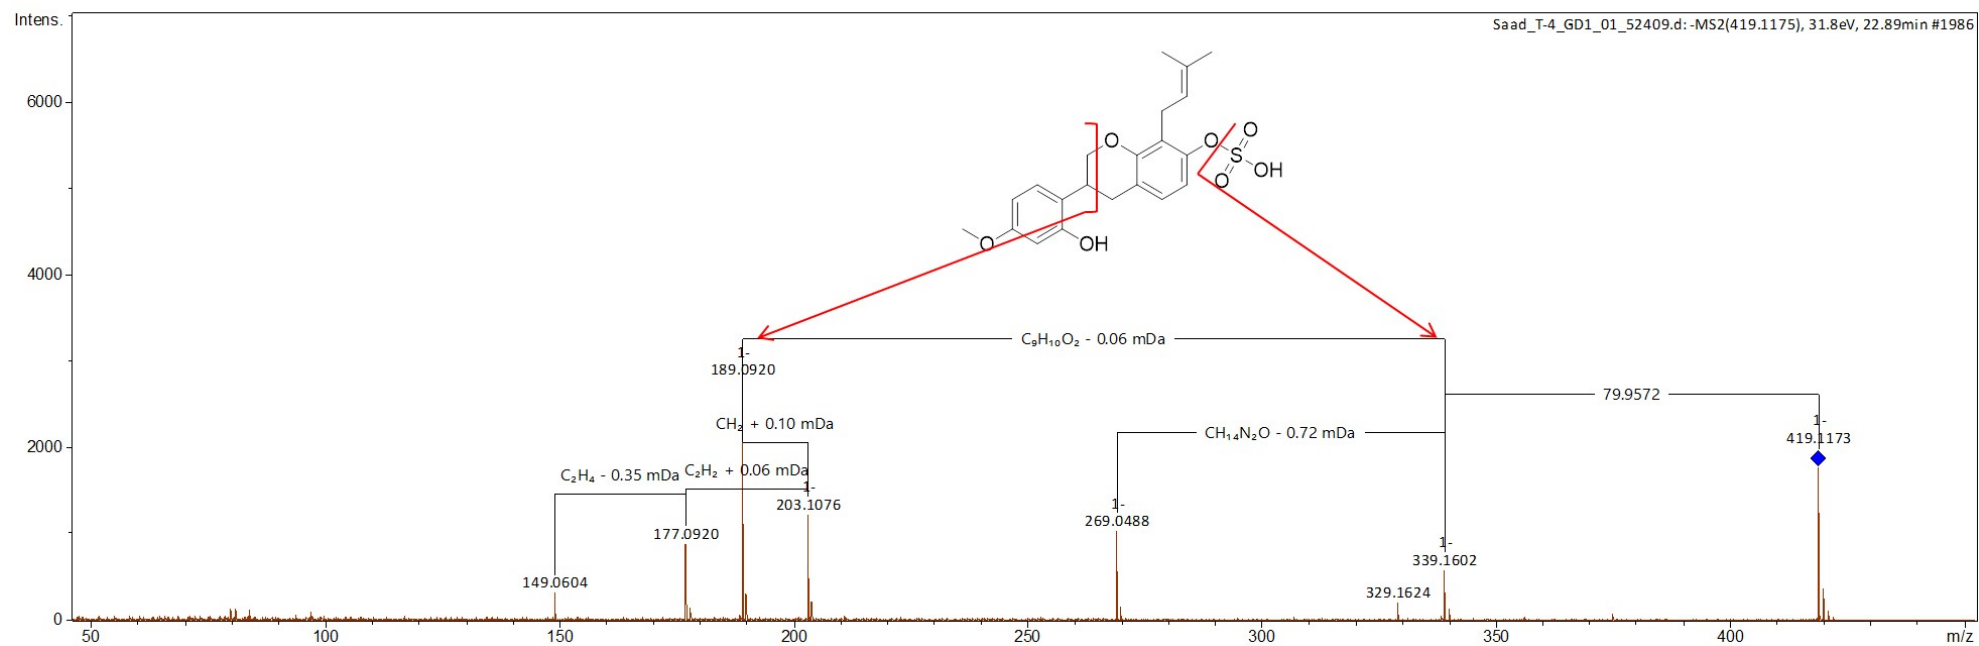

## Supplementary Tables

Supplementary Table S1: Parameters set for the construction of both FBMNs through the GNPS platform

|                              | Negative FBMN | Positive FBMN |
|------------------------------|---------------|---------------|
| Precursor ion mass tolerance | 0.05          | 0.05          |
| Fragment ion mass tolerance  | 0.05          | 0.05          |
| Cosine score                 | 0.7           | 0.7           |
| Min shared fragments         | 4             | 4             |



**Supplementary Table S2: Metabolites identified in the leaves of the studied *Morus* species via UPLC-HRMS/MS analysis.**

-: absent, tr: traces, +: present, ++: abundant, +++: major.

\*compounds previously isolated from *Morus* species, #: tentatively assigned new compounds

|    | Compound Class | name                                               | RT   | M-H | MS <sup>2</sup> | M+H             | MS <sup>2</sup>                                         | Formula                                          | <i>M. nigra</i> | <i>M. alba</i> | <i>M. indica</i> | <i>M. macro-oura</i> | Reference |
|----|----------------|----------------------------------------------------|------|-----|-----------------|-----------------|---------------------------------------------------------|--------------------------------------------------|-----------------|----------------|------------------|----------------------|-----------|
| 1. | Iminosugars    | Moranoline di-O-hexoside #                         | 4.61 |     |                 | 488.1979 (-1.0) | 326.1457, 308.1344, <b>164.092</b> , 146.0813, 127.0395 | C <sub>18</sub> H <sub>33</sub> NO <sub>14</sub> | +               | +              | +                | +                    | [1]       |
| 2. | Iminosugars    | Moranoline-O-glucoside *                           | 4.65 |     |                 | 326.1447 (-0.5) | <b>164.0919</b> , 146.0814, 128.0709                    | C <sub>12</sub> H <sub>23</sub> NO <sub>9</sub>  | +               | +              | +                | +                    | [1]       |
| 3. | Iminosugars    | Fagomine-O-glucoside *                             | 4.69 |     |                 | 310.1498 (-0.5) | <b>148.097</b> , 130.0865, 112.0759, 97.0285, 85.0285   | C <sub>12</sub> H <sub>23</sub> NO <sub>8</sub>  | +               | tr             | tr               | +++                  | [2]       |
| 4. | Iminosugars    | hydroxy-(hydroxymethyl)-pyrrolidinyl-O-glucoside * | 4.70 |     |                 | 296.1343 (-1.1) | <b>134.0814</b> , 85.0285                               | C <sub>11</sub> H <sub>21</sub> NO <sub>8</sub>  | +               | +              | +                | +++                  | [1]       |

|    | Compound Class          | name                                               | RT   | M-H               | MS <sup>2</sup>                                                                  | M+H                | MS <sup>2</sup>                                                                     | Formula                                         | M. nigra | M. alba | M. indica | M. macrooura | Reference |
|----|-------------------------|----------------------------------------------------|------|-------------------|----------------------------------------------------------------------------------|--------------------|-------------------------------------------------------------------------------------|-------------------------------------------------|----------|---------|-----------|--------------|-----------|
| 5. | Organic acid            | Quinic acid*                                       | 5.44 | 191.056<br>(0.6)  | 173, 127,<br>111,<br><b>85.0296</b>                                              | 193.071<br>(-0.5)  | 174.0769,<br>129.0550,<br>111.042,8<br><b>3.0492</b>                                | C <sub>7</sub> H <sub>12</sub> O <sub>6</sub>   | ++       | +       | ++        | +++          | GNPS, [3] |
| 6. | Phenolic glycoside      | Hydroxy-dimethoxyphenyl-O-hexoside                 | 5.91 | 331.1033<br>(0.4) | 283.2637,<br>211.0244,<br>193.0149,<br>169.0137,<br>151.0037,<br><b>123.0449</b> |                    |                                                                                     | C <sub>14</sub> H <sub>20</sub> O <sub>9</sub>  | +++      | +       | +         | +            |           |
| 7. | Benzoic acid derivative | Dihydroxy benzoic acid-O-hexoside isomer I         | 6.06 | 315.072<br>(0.5)  | <b>153.0193</b> ,<br>109.0295                                                    | -                  | -                                                                                   | C <sub>13</sub> H <sub>16</sub> O <sub>9</sub>  | ++       | --      | --        | +++          | GNPS      |
| 8. | Amino acid              | N-[carboxy-2-methylbutyl] D-Glutamic acid isomer I | 6.24 |                   |                                                                                  | 262.1289<br>(-1.4) | 244.1182,<br>216.1231,<br>198.1122,<br>130.086,<br>118.0859,<br>98.0602,<br>81.0697 | C <sub>11</sub> H <sub>19</sub> NO <sub>6</sub> | -        | ++      | ++        | -            | [4]       |
| 9. | Amino acid              | N-fructosyl phenylalanine isomer I                 | 7.17 |                   |                                                                                  | 328.1398<br>(-2.1) | 310.1293,<br>292.1184,<br>264.1237,<br><b>246.1132</b> ,                            | C <sub>15</sub> H <sub>21</sub> NO <sub>7</sub> | +        | -       | -         | -            | GNPS      |

|     | Compound Class | name                                                        | RT   | M-H | MS <sup>2</sup> | M+H             | MS <sup>2</sup>                                                                                                                                | Formula                                         | <i>M. nigra</i> | <i>M. alba</i> | <i>M. indica</i> | <i>M. macrooura</i> | Reference |
|-----|----------------|-------------------------------------------------------------|------|-----|-----------------|-----------------|------------------------------------------------------------------------------------------------------------------------------------------------|-------------------------------------------------|-----------------|----------------|------------------|---------------------|-----------|
|     |                |                                                             |      |     |                 |                 | 228.1023,<br>198.0924,<br>178.0862<br>166.0867<br>143.0582<br>132.0809,<br>120.081                                                             |                                                 |                 |                |                  |                     |           |
| 10. | Amino acid     | <i>N</i> -[carboxy-2-methylbutyl] D-Glutamic acid isomer II | 7.24 |     |                 | 262.1289 (-1.4) | 244.1182,<br>216.1231,<br>198.1122,<br>130.086,<br>118.0859,<br>98.0602,<br>81.0697                                                            | C <sub>11</sub> H <sub>19</sub> NO <sub>6</sub> | -               | tr             | -                | +++                 |           |
| 11. | Amino acid     | <i>N</i> -fructosyl phenylalanine isomer II                 | 7.31 |     |                 | 328.1393 (0.8)  | 310.1293,<br>292.1184,<br>264.1237,<br><b>246.1132</b> ,<br>228.1023,<br>198.0924,<br>178.0862<br>166.0867<br>143.0582<br>132.0809,<br>120.081 | C <sub>15</sub> H <sub>21</sub> NO <sub>7</sub> |                 | -              | +++              | +                   | GNPS      |

|     | Compound Class           | name                                                    | RT   | M-H             | MS <sup>2</sup>                                                           | M+H             | MS <sup>2</sup>                             | Formula                                         | M. nigra | M. alba | M. indica | M. macrooura | Reference |
|-----|--------------------------|---------------------------------------------------------|------|-----------------|---------------------------------------------------------------------------|-----------------|---------------------------------------------|-------------------------------------------------|----------|---------|-----------|--------------|-----------|
| 12. | Amino acid               | N-Benzoyl-L-aspartic acid                               | 7.81 |                 |                                                                           | 238.0716 (-2.3) | 127.0391, 109.0286, 97.0288, <b>85.0286</b> | C <sub>11</sub> H <sub>11</sub> NO <sub>5</sub> | ++       | +       | +         | -            | [5]       |
| 13. | Phenolic glycoside       | Glucogallin                                             | 7.98 | 331.0670 (-0.5) | 283.2656, 211.025, 193.0137, <b>169.0143</b> , <b>151.0036</b> , 125.0242 |                 |                                             | C <sub>13</sub> H <sub>16</sub> O <sub>10</sub> | -        | +       | +         | ++           |           |
| 14. | Phenolic glycoside       | dihydroxy-methoxyphenyl-O-hexoside (Picraquassioside D) | 8.03 | 301.0931 (-0.6) | <b>139.0401</b>                                                           |                 |                                             | C <sub>13</sub> H <sub>18</sub> O <sub>8</sub>  | -        | tr      | tr        | +++          | [6]       |
| 15. | Benzoic acid derivative  | Dihydroxy benzoic acid-O-hexoside isomer II             | 8.23 | 315.0721 (0.2)  | 200.0553, <b>153.0193</b> , 109.0294                                      | -               | -                                           | C <sub>13</sub> H <sub>16</sub> O <sub>9</sub>  | --       | tr      | ++        | +++          | GNPS      |
| 16. | Cinnamic acid derivative | Sinapoyl-O-hexoside                                     | 8.36 | 371.098 (1.0)   | <b>191.0561</b>                                                           |                 |                                             | C <sub>16</sub> H <sub>20</sub> O <sub>10</sub> | +        | +       | +         | +            | [7]       |

|     | Compound Class           | name                                                  | RT   | M-H            | MS <sup>2</sup>                                                    | M+H             | MS <sup>2</sup>                                              | Formula                                                       | M. nigra | M. alba | M. indica | M. macroura | Reference |
|-----|--------------------------|-------------------------------------------------------|------|----------------|--------------------------------------------------------------------|-----------------|--------------------------------------------------------------|---------------------------------------------------------------|----------|---------|-----------|-------------|-----------|
| 17. | Peptide                  | Glutamylvaline                                        |      |                |                                                                    | 247.1292 (-1.3) | 184.0973<br>118.0867,<br>84.0445,<br><b>72.0808</b>          | C <sub>10</sub> H <sub>18</sub> N <sub>2</sub> O <sub>5</sub> | +        | ++      | +         | +           |           |
| 18. | Benzoic acid derivative  | Hydroxybenzoic acid-O-hexoisde isomer I               | 8.67 | 299.0771 (0.5) | <b>137.0242</b> ,<br>93.0348                                       | -               |                                                              | C <sub>13</sub> H <sub>16</sub> O <sub>8</sub>                | +        | +       | +         | +           | [8]       |
| 19. | Amino acid               | N <sup>2</sup> -(4-Hydroxy-methoxybenzoyl)-D-arginine | 8.82 | 323.1347 (4.2) | <b>164.0719</b> ,<br>147.0447,<br>89.0244                          |                 |                                                              | C <sub>14</sub> H <sub>20</sub> N <sub>4</sub> O <sub>5</sub> | ++       | ++      | -         | +++         | [9]       |
| 20. | Cinnamic acid derivative | O-(O-hexosylcaffeoyl) quinic acid *                   | 8.94 | 515.1398 (1.5) | 353.0873,<br>315.0716,<br><b>191.056</b>                           |                 |                                                              | C <sub>22</sub> H <sub>28</sub> O <sub>14</sub>               | +        | ++      | +         | ++          | [3]       |
| 21. | Benzoic acid derivatives | Vanillic acid-O-hexoside                              | 9.24 | 329.0876 (0.7) | 283.2654,<br><b>167.035</b> ,<br>152.0111,<br>123.0452<br>108.0214 |                 |                                                              | C <sub>14</sub> H <sub>18</sub> O <sub>9</sub>                | +        | +       | +         | +           | GNPS, [7] |
| 22. | Coumarin                 | Umbelliferone*                                        | 9.45 |                |                                                                    | 163.039         | 145.028,<br>135.0445,<br>120.0806,<br>117.0337,<br>105.0436, | C <sub>9</sub> H <sub>6</sub> O <sub>3</sub>                  | +        | +       | +         | +           | [10]      |

|     | Compound Class           | name                                            | RT   | M-H             | MS <sup>2</sup>                                      | M+H             | MS <sup>2</sup>                                   | Formula                                                       | M. nigra | M. alba | M. indica | M. macrooura | Reference    |
|-----|--------------------------|-------------------------------------------------|------|-----------------|------------------------------------------------------|-----------------|---------------------------------------------------|---------------------------------------------------------------|----------|---------|-----------|--------------|--------------|
|     |                          |                                                 |      |                 |                                                      |                 | 89.0385                                           |                                                               |          |         |           |              |              |
| 23. | Megastigmane             | Megastigmanen e-epoxy-diol di-O-hexoside        | 9.69 | 549.2549 (0.7)  | 387.2023, 191.0553, <b>119.0349</b> , <b>89.0246</b> |                 |                                                   | C <sub>25</sub> H <sub>42</sub> O <sub>13</sub>               | +        | +       | +         | +            | [11]         |
| 24. | Flavonoid-O-glycoside    | Quercetin 3, 7 di-O-glucoside isomer I*         | 9.78 | 625.1412 (-0.2) | <b>463.0868</b> , 301.0348                           | 627.1561 (-0.9) | <b>303.0502</b>                                   | C <sub>27</sub> H <sub>30</sub> O <sub>17</sub>               | +        | ++      | +         | +            | [12], [13]   |
| 25. | Cinnamic acid derivative | O-caffeoyl quinic acid isomer I*                | 9.79 | 353.0876 (0.5)  | <b>191.0561</b>                                      | 355.1028 (-1.2) | <b>163.0392</b>                                   | C <sub>16</sub> H <sub>18</sub> O <sub>9</sub>                | +        | +       | +         | +            | GNPS, [14]   |
| 26. | Benzoic acid derivative  | O-benzoylsucrose                                | 9.87 | 445.1343 (1.9)  | 301.0922, <b>139.0399</b>                            |                 |                                                   | C <sub>19</sub> H <sub>26</sub> O <sub>12</sub>               | +++      | tr      | tr        | tr           | [15]<br>[16] |
| 27. | Flavonoid-O-glycoside    | Quercetin-O-hexoside –O-(hexosyl deoxyhexoside) | 9.89 | 771.1988 (0)    | <b>609.1459</b> , 462.0805, 301.0354                 | 773.2134 (-1.0) | 465.1033, <b>303.0502</b>                         | C <sub>33</sub> H <sub>40</sub> O <sub>21</sub>               | +        | +       | +++       | +            | [15]         |
| 28. | Amino acid               | L-tryptophan – N-hexoside                       | 9.95 |                 |                                                      | 367.1504 (-1.0) | 332.1133, 303.1344, 276.1231, 258.1129, 229.0974, | C <sub>17</sub> H <sub>22</sub> N <sub>2</sub> O <sub>7</sub> | +        | +       | +         | +            | GNPS         |

|     | Compound Class           | name                                     | RT    | M-H            | MS <sup>2</sup>                                | M+H                       | MS <sup>2</sup>                      | Formula                                                       | M. nigra | M. alba | M. indica | M. macrooura | Reference      |
|-----|--------------------------|------------------------------------------|-------|----------------|------------------------------------------------|---------------------------|--------------------------------------|---------------------------------------------------------------|----------|---------|-----------|--------------|----------------|
|     |                          |                                          |       |                |                                                |                           | <b>188.0707</b>                      |                                                               |          |         |           |              |                |
| 29. | Flavonoid-O-glycoside    | Quercetin 3, 7 di-O-glucoside isomer II* | 10.01 | 625.1408 (0.3) | <b>463.0867</b> , 301.0349                     | 627.1558 (-0.4)           | 303.0502                             | C <sub>27</sub> H <sub>30</sub> O <sub>17</sub>               | +        | +++     | -         | +            | [12], GNPS     |
| 30. | Cinnamic acid derivative | Coumaric acid O-hexoside                 | 10.22 | 325.0928 (0.4) | 163.0399, <b>119.0503</b>                      | -                         | -                                    | C <sub>15</sub> H <sub>18</sub> O <sub>8</sub>                | +        | ++      | +         | +            | [7] SELFLOOPED |
| 31. | Stilbene glycoside       | Mulberroside E *                         | 10.26 | 597.1822 (0.5) | 549.2539, 389.1241, <b>227.0714</b> , 189.0763 | [M-H+HCO OH] <sup>-</sup> |                                      | C <sub>26</sub> H <sub>32</sub> O <sub>13</sub>               | -        | +       | ++        | -            | [17]           |
| 32. | Coumarin                 | Dihydroxy coumarin-O-glucoside isomer I* | 10.29 | 339.0720 (0.5) | <b>177.0191</b>                                | -                         | -                                    | C <sub>15</sub> H <sub>16</sub> O <sub>9</sub>                | +        | -       | -         | +++          | [17]           |
| 33. | Flavonoid glycoside      | Naringenin-O-methyl ether-O-hexoside     | 10.30 |                |                                                | 449.1444 (-0.4)           | <b>287.0915</b> , 269.0811, 241.0861 | C <sub>22</sub> H <sub>24</sub> O <sub>10</sub>               | -        | -       | -         | +            | [18]           |
| 34. | Peptide                  | Pyroglutamyl - valine                    | 10.44 |                |                                                | 229.1185 (-0.8)           | 183.1127, 84.0445, <b>72.0807</b>    | C <sub>10</sub> H <sub>16</sub> N <sub>2</sub> O <sub>4</sub> | +        | ++      | +         | +            | [19]           |

|     | Compound Class           | name                                          | RT    | M-H                | MS <sup>2</sup>                            | M+H                | MS <sup>2</sup>              | Formula                                                       | M. nigra | M. alba | M. indica | M. macrooura | Reference  |
|-----|--------------------------|-----------------------------------------------|-------|--------------------|--------------------------------------------|--------------------|------------------------------|---------------------------------------------------------------|----------|---------|-----------|--------------|------------|
| 35. | Flavonoid-O-glycoside    | Kaempferol -O-rutinoside--O-glucoside *       | 10.49 | 755.2037<br>(0.4)  | <b>593.1502</b> ,<br>447.0915,<br>285.0401 | 757.2192<br>(-0.8) | 449.1081,<br><b>287.0554</b> | C <sub>33</sub> H <sub>40</sub> O <sub>20</sub>               | +        | +       | ++        | +            | [15]       |
| 36. | Coumarin                 | Dihydroxy coumarin-O-glucoside isomer II*     | 10.55 | 339.0722<br>(-0.0) | <b>177.0192</b>                            | 341.0867<br>(-0.0) | <b>179.0340</b>              | C <sub>15</sub> H <sub>16</sub> O <sub>9</sub>                | +        | ++      | ++        | +++          | GNPS, [17] |
| 37. | Flavonoid-O-glycoside    | Tetrahydroxyflavanone di-O-hexoside isomer I  | 10.62 | 611.1607<br>(1.7)  | 447.0918,<br>285.0402,<br><b>241.0504</b>  |                    |                              | C <sub>27</sub> H <sub>32</sub> O <sub>16</sub>               | -        | -       | +++       | -            | [6]        |
| 38. | Benzoic acid derivative  | Hydroxybenzoic acid-O-hexoisde isomer II      | 10.77 | 299.0772<br>(0.2)  | <b>137.0242</b> ,<br>93.0347               | -                  | -                            | C <sub>13</sub> H <sub>16</sub> O <sub>8</sub>                | +        | ++      | +         | +            | [8]        |
| 39. | Flavonoid-O-glycoside    | Tetrahydroxyflavanone di-O-hexoside isomer II | 10.82 | 611.1612<br>(0.9)  | 447.0926,<br>403.1031,<br><b>241.0505</b>  |                    |                              | C <sub>27</sub> H <sub>32</sub> O <sub>16</sub>               | -        | -       | +++       | -            | [6]        |
| 40. | Cinnamic acid derivative | O-caffeoyl quinic acid isomer II*             | 10.98 | 353.0877<br>(0.2)  | <b>191.0561</b>                            | 355.1027<br>(-0.9) | <b>163.0393</b>              | C <sub>16</sub> H <sub>18</sub> O <sub>9</sub>                | +        | +       | +         | +            | GNPS, [14] |
| 41. | Amino acid               | Phenylglutamate                               | 11.00 |                    |                                            | 295.1294<br>(-1.7) | 232.0969,<br>186.0916,       | C <sub>14</sub> H <sub>18</sub> N <sub>2</sub> O <sub>5</sub> | +        | ++      | +         | +            |            |



|     | Compound Class            | name                                          | RT    | M-H                      | MS <sup>2</sup>                                         | M+H             | MS <sup>2</sup>             | Formula                                         | M. nigra | M. alba | M. indica | M. macrooura | Reference  |
|-----|---------------------------|-----------------------------------------------|-------|--------------------------|---------------------------------------------------------|-----------------|-----------------------------|-------------------------------------------------|----------|---------|-----------|--------------|------------|
|     |                           |                                               |       |                          |                                                         |                 | <b>120.0811,</b><br>84.0444 |                                                 |          |         |           |              |            |
| 42. | Flavonoid-O-glycoside     | Quercetin -O-(rutinoside-O-hexoside) isomer I | 11.14 |                          |                                                         | 773.2139 (-0.6) | <b>303.0504</b>             | C <sub>33</sub> H <sub>40</sub> O <sub>21</sub> | ++       | -       | -         | +            | [15]       |
| 43. | Cinnamic acid derivative  | O-caffeoyl quinic acid isomer III*            | 11.25 | 353.0877 (0.3)           | <b>191.0561</b>                                         | 355.1025 (-0.5) | 163.0391                    | C <sub>16</sub> H <sub>18</sub> O <sub>9</sub>  | +        | +       | +         | +            | GNPS, [14] |
| 44. | Flavonoid-O-glycoside     | Quercetin -O-glucosyl-O-rutinoside isomer II  | 11.28 | -                        | -                                                       | 773.2135 (-0.1) | <b>303.0503</b>             | C <sub>33</sub> H <sub>40</sub> O <sub>21</sub> | ++       | +       | +++       | ++           | [15]       |
| 45. | Cinnamic acid derivative  | Rosmarinic acid                               | 11.52 | 359.0768 (1.2)           | 271.0972,<br><b>242.0582</b>                            |                 |                             | C <sub>18</sub> H <sub>16</sub> O <sub>8</sub>  | ++       | +       | ++        | +            | [20]       |
| 46. | Flavonoid-O-glycoside     | Quercetin -O-(di-O-rhamnosyl-O-hexoside)*     | 11.61 | 755.2032 (1.1)<br>in neg | <b>300.0271</b>                                         | 757.2185 (0.1)  | <b>303.0501</b>             | C <sub>33</sub> H <sub>40</sub> O <sub>20</sub> | +        | +       | ++        | +            | GNPS, [21] |
| 47. | Benzyl alcohol derivative | Benzyl -O-pentosyl-O-hexoside                 | 11.48 | 401.1452 (0.4)           | 269.1021,<br>237.0758,<br><b>219.0663,</b><br>193.0503, |                 |                             | C <sub>18</sub> H <sub>26</sub> O <sub>10</sub> | +        | +       | +         | +            |            |

|     | Compound Class                 | name                                                      | RT    | M-H             | MS <sup>2</sup>                                        | M+H             | MS <sup>2</sup> | Formula                                         | <i>M. nigra</i> | <i>M. alba</i> | <i>M. indica</i> | <i>M. macrooura</i> | Reference  |
|-----|--------------------------------|-----------------------------------------------------------|-------|-----------------|--------------------------------------------------------|-----------------|-----------------|-------------------------------------------------|-----------------|----------------|------------------|---------------------|------------|
|     |                                |                                                           |       |                 | 161.0458,<br>101.0245                                  |                 |                 |                                                 |                 |                |                  |                     |            |
| 48. | Cinnamic acid derivative       | <i>O</i> -caffeoyl quinic acid isomer IV*                 | 11.94 | 353.0873 (1.3)  | <b>191.056</b>                                         | 355.1025 (-0.4) | 163.0393        | C <sub>16</sub> H <sub>18</sub> O <sub>9</sub>  | +               | +              | +                | +                   | GNPS, [13] |
| 49. | Flavonoid- <i>O</i> -glycoside | Quercetin- <i>O</i> -dihexoside *                         | 12.05 | 625.1414 (-0.6) | <b>300.0276</b>                                        | 627.1556 (-0.1) | <b>303.0501</b> | C <sub>27</sub> H <sub>30</sub> O <sub>17</sub> | +               | +              | +                | +++                 | GNPS, [3]  |
| 50. | Flavonoid- <i>O</i> -glycoside | Kaempferol - <i>O</i> -rutinoside- <i>O</i> -rhamnoside * | 12.20 | 739.2087 (-1.2) | <b>284.0324</b>                                        | 741.2239 (-0.3) | <b>287.0552</b> | C <sub>33</sub> H <sub>40</sub> O <sub>19</sub> | +               | +              | ++               | +                   | GNPS, [15] |
| 51. | Flavonoid- <i>O</i> -glycoside | Scutellarein dimethylether- <i>O</i> -sophoroside         | 12.48 | 637.1776 (-0.3) | <b>475.124,</b><br>295.0610                            |                 |                 | C <sub>29</sub> H <sub>34</sub> O <sub>16</sub> | -               | -              | -                | ++                  | [22]       |
| 52. | Flavonoid- <i>O</i> -glycoside | Quercetin- <i>O</i> -rutinoside *                         | 12.56 | 609.1458 (0.5)  | <b>300.0273</b>                                        | 611.1612 (-0.8) | <b>303.0500</b> | C <sub>27</sub> H <sub>30</sub> O <sub>16</sub> | ++              | -              | ++               | ++                  | [23]       |
| 53. | Iridoid glycoside              | <i>O</i> -hydroxybenzoyl monomelittoside isomer I         | 12.60 | 481.1347 (0.9)  | 316.0219,<br>179.0347,<br>163.0397,<br><b>137.0243</b> |                 |                 | C <sub>22</sub> H <sub>26</sub> O <sub>12</sub> | -               | +++            | +++              | ++                  | [24]       |
| 54. | Cinnamic acid derivative       | <i>O</i> -coumaroyl-quinic acid                           | 12.69 | 337.0926 (0.9)  | <b>191.0559</b>                                        | 339.1077 (-0.9) | <b>147.0442</b> | C <sub>16</sub> H <sub>18</sub> O <sub>8</sub>  | ++              | +              | +                | +                   | GNPS       |

|     | Compound Class        | name                                               | RT    | M-H             | MS <sup>2</sup>                                                           | M+H             | MS <sup>2</sup>                                          | Formula                                         | M. nigra | M. alba | M. indica | M. macrooura | Reference |
|-----|-----------------------|----------------------------------------------------|-------|-----------------|---------------------------------------------------------------------------|-----------------|----------------------------------------------------------|-------------------------------------------------|----------|---------|-----------|--------------|-----------|
| 55. | Flavonoid-O-glycoside | Quercetin-O-rutinoside isomer II *                 | 12.85 | -               | -                                                                         | 611.1603 (0.6)  | <b>303.0500</b>                                          | C <sub>27</sub> H <sub>30</sub> O <sub>16</sub> | +        | +       | +         | +            | [23]      |
| 56. | Flavonoid-O-glycoside | Quercetin-O-glucoside *                            | 12.84 |                 |                                                                           | 465.1029 (-0.3) | 330.2650, <b>303.0503</b> , 251.1258, 217.1229           | C <sub>21</sub> H <sub>20</sub> O <sub>12</sub> | ++       | +       | ++        | +            | [15]      |
| 57. | Lignan                | Lyoniresinol-O-hexoside                            | 13.06 | 581.2234 (-0.1) | <b>449.2024</b> , <b>389.1601</b> , 367.1030, 305.1139, 216.08761 72.0890 |                 |                                                          | C <sub>28</sub> H <sub>38</sub> O <sub>13</sub> | -        | ++      | -         | ++           | [25]      |
| 58. | Iridoid glycoside     | ligstroside-O-hexoside                             | 13.06 | 685.2353 (-0.6) | <b>477.1765</b> , 315.1238                                                |                 |                                                          | C <sub>31</sub> H <sub>42</sub> O <sub>17</sub> | -        | ++      | tr        | +++          | [26]      |
| 59. | Chalcone              | trimethoxy-dihydrochalcone-O-dihexoside isomer I # | 13.09 |                 |                                                                           | 641.2445 (-0.8) | 329.1234, 299.1284, 193.0863, <b>167.0704</b> , 149.0599 | C <sub>30</sub> H <sub>40</sub> O <sub>15</sub> | -        | +       | -         | -            |           |
| 60. | Flavonoid-O-glycoside | Kaempferol-O-hexoside *                            | 13.14 |                 |                                                                           | 449.1077 (0.2)  | <b>287.0556</b> , 217.1235                               | C <sub>21</sub> H <sub>20</sub> O <sub>11</sub> | +        | ++      | +++       | +            | [15]      |

|     | Compound Class           | name                                       | RT    | M-H             | MS <sup>2</sup>                               | M+H             | MS <sup>2</sup> | Formula                                         | <i>M. nigra</i> | <i>M. alba</i> | <i>M. indica</i> | <i>M. macrooura</i> | Reference  |
|-----|--------------------------|--------------------------------------------|-------|-----------------|-----------------------------------------------|-----------------|-----------------|-------------------------------------------------|-----------------|----------------|------------------|---------------------|------------|
| 61. | Flavonoid-O-glycoside    | Kaempferol-O-rutinoside isomer I *         | 13.16 | 593.1507 (0.9)  | <b>284.0324</b>                               | 595.1661 (-0.6) | <b>287.0553</b> | C <sub>27</sub> H <sub>30</sub> O <sub>15</sub> | +               | +              | +++              | +                   | GNPS, [23] |
| 62. | Lignan                   | Lariciresinol-O-hexoside                   | 13.19 | 521.2022 (1.2)  | <b>329.1391</b>                               |                 |                 | C <sub>26</sub> H <sub>34</sub> O <sub>11</sub> | +++             | +              | +                | +                   | GNPS, [27] |
| 63. | Iridoid glycoside        | O-hydroxybenzoyl monomelittoside isomer II | 13.26 | 481.1352 (-0.1) | 316.0219, 179.0347, 163.0397, <b>137.0243</b> |                 |                 | C <sub>22</sub> H <sub>26</sub> O <sub>12</sub> | tr              | +++            | +++              | ++                  | [24]       |
| 64. | Cinnamic acid derivative | O-caffeoylquinic acid methyl ester         | 13.29 | 367.1034 (0.2)  | <b>179.0349</b> , 161.0243, 135.0451          |                 |                 | C <sub>17</sub> H <sub>20</sub> O <sub>9</sub>  | ++              | +              | +                | +                   |            |
| 65. | Coumarin                 | Dihydroxycoumarin                          | 13.30 | 177.0193 (0.4)  | 149.0243, <b>133.0293</b> , 105.0346          |                 |                 | C <sub>9</sub> H <sub>6</sub> O <sub>4</sub>    | +               | +              | +                | +++                 | GNPS       |
| 66. | Flavonoid-O-glycoside    | kaempferol -O-rutinoside isomer II*        | 13.54 | 593.1506 (1.0)  | <b>285.0401</b>                               | 595.1662 (-0.8) | <b>287.0552</b> | C <sub>27</sub> H <sub>30</sub> O <sub>15</sub> | +               | ++             | +                | +                   | GNPS, [23] |
| 67. | Flavonoid-O-glycoside    | Quercetin-O-glucoside *                    | 13.65 | 463.0879 (0.7)  | <b>300.0274</b>                               | 465.1027 (0.1)  | <b>303.0498</b> | C <sub>21</sub> H <sub>20</sub> O <sub>12</sub> | +               | +              | +                | +                   | GNPS, [23] |

|     | Compound Class                 | name                                                | RT    | M-H               | MS <sup>2</sup>                         | M+H               | MS <sup>2</sup>                                                                   | Formula                                         | <i>M. nigra</i> | <i>M. alba</i> | <i>M. indica</i> | <i>M. macro-oura</i> | Reference  |
|-----|--------------------------------|-----------------------------------------------------|-------|-------------------|-----------------------------------------|-------------------|-----------------------------------------------------------------------------------|-------------------------------------------------|-----------------|----------------|------------------|----------------------|------------|
| 68. | Lignan                         | Syringaresinol- <i>O</i> -hexoside                  | 13.95 | 579.2079<br>(0.7) | <b>417.1551</b> ,<br>181.0506           |                   |                                                                                   | C <sub>28</sub> H <sub>36</sub> O <sub>13</sub> | +               | ++             | +                | +                    | GNPS       |
| 69. | Megastigmane                   | Oxo -ionol <i>O</i> -hexoside                       | 13.99 |                   |                                         | 371.2063<br>(0.2) | 255.0655,<br>227.0704,<br><b>209.1539</b> ,<br>191.1433,<br>165.1277,<br>137.0959 | C <sub>19</sub> H <sub>30</sub> O <sub>7</sub>  | +               | ++             | +                | +                    | [28]       |
| 70. | Acylated flavonoid glycoside   | Quercetin- <i>O</i> -( <i>O</i> -malonyl) hexoside* | 14.06 |                   |                                         | 551.1032<br>(0.0) | <b>303.0503</b> ,<br>127.0391                                                     | C <sub>24</sub> H <sub>22</sub> O <sub>15</sub> | +++             | ++             | +                | -                    | [15]       |
| 71. | Chromone derivative            | Hydroxy-isopropylchromanone- <i>O</i> -hexoside     | 14.07 | 383.1346<br>(0.4) | <b>221.0819</b> ,<br>177.0921           | -                 | -                                                                                 | C <sub>18</sub> H <sub>24</sub> O <sub>9</sub>  | tr              | tr             | tr               | +++                  | [29]       |
| 72. | Cinnamic acid derivative       | Di- <i>O</i> -caffeoylquinic acid isomer I *        | 14.22 | 515.118<br>(2.0)  | 353,335,191,<br><b>179</b> ,173,161,135 |                   |                                                                                   | C <sub>25</sub> H <sub>24</sub> O <sub>12</sub> | +               | +              | +                | +                    | [3]        |
| 73. | Flavonoid- <i>O</i> -glycoside | Kaempferol- <i>O</i> -glucoside *                   | 14.47 | 447.093<br>(0.6)  | <b>284.0327</b>                         | 449.1078<br>(0.1) | 287.0553                                                                          | C <sub>21</sub> H <sub>20</sub> O <sub>11</sub> | +               | +              | +                | +                    | GNPS, [15] |
| 74. | Benzoic acid                   | Dihydroxy                                           | 14.60 | 153.0192          | <b>109.0296</b> ,                       | 155.0341          | <b>137.0235</b>                                                                   | C <sub>7</sub> H <sub>6</sub> O <sub>4</sub>    | +               | +              | ++               | ++                   | GNPS, [3]  |

|     | Compound Class               | name                                                           | RT          | M-H            | MS <sup>2</sup>                                | M+H             | MS <sup>2</sup>                                          | Formula                                         | M. nigra | M. alba | M. indica | M. macrooura | Reference  |
|-----|------------------------------|----------------------------------------------------------------|-------------|----------------|------------------------------------------------|-----------------|----------------------------------------------------------|-------------------------------------------------|----------|---------|-----------|--------------|------------|
|     | derivative                   | benzoic acid*                                                  |             | (0.9)          | 67.0192                                        | (-1.3)          |                                                          |                                                 |          |         |           |              |            |
| 75. | Acylated flavonoid glycoside | Quercetin- <i>O</i> -( <i>O</i> -acetyl)hexoside *             | 14.82       |                |                                                | 507.1137 (-0.7) | <b>303.0505</b> , 187.0606, 81.0335                      | C <sub>23</sub> H <sub>22</sub> O <sub>13</sub> | +        | +       | +         | -            | [30]       |
| 76. | Chalcone                     | trimethoxy-dihydrochalcone- <i>O</i> -dihexoside isomer II #   | 14.88       |                |                                                | 641.2444 (-0.6) | 329.1234, 299.1284, 193.0863, <b>167.0704</b> , 149.0599 | C <sub>30</sub> H <sub>40</sub> O <sub>15</sub> | -        | -       | -         | +            |            |
| 77. | Cinnamic acid derivative     | Di- <i>O</i> -caffeoylquinic acid isomer II                    | 14.89       | 515.1186 (1.7) | 353.087, <b>191.0558</b> , 179.0347            | 517.1343 (-0.4) | 319.081, <b>163.0391</b>                                 | C <sub>25</sub> H <sub>24</sub> O <sub>12</sub> | ++       | -       | ++        | +            | [3]        |
| 78. | Acylated flavonoid glycoside | Kaempferol- <i>O</i> -( <i>O</i> -malonyl hexoside) isomer I * | 15.04       |                |                                                | 535.1085 (-0.5) | <b>287.0555</b>                                          | C <sub>24</sub> H <sub>22</sub> O <sub>14</sub> |          |         |           |              | [15], GNPS |
| 79. | Acylated flavonoid glycoside | Kaempferol- <i>O</i> -( <i>O</i> -acetyl hexoside) isomer I*   | 15.05 (2.1) | 489.1028 (2.1) | <b>284.0322</b> , 255.0295, 229.0500, 191.0568 |                 |                                                          | C <sub>23</sub> H <sub>22</sub> O <sub>12</sub> | ++       | +       | +         | -            | [3]        |
| 80. | Acylated flavonoid           | Kaempferol - <i>O</i> -( <i>O</i> -malonyl hexoside)           | 15.08       |                |                                                | 535.1087 (-0.9) | <b>287.0554</b>                                          | C <sub>24</sub> H <sub>22</sub> O <sub>14</sub> | ++       | +       | +         | -            | [15], GNPS |

|     | Compound Class           | name                                            | RT    | M-H               | MS <sup>2</sup>                            | M+H                | MS <sup>2</sup>                                         | Formula                                         | M. nigra | M. alba | M. indica | M. macrooura | Reference |
|-----|--------------------------|-------------------------------------------------|-------|-------------------|--------------------------------------------|--------------------|---------------------------------------------------------|-------------------------------------------------|----------|---------|-----------|--------------|-----------|
|     | glycoside                | isomer II                                       |       |                   |                                            |                    |                                                         |                                                 |          |         |           |              |           |
| 81. | Cinnamic acid            | Couamric acid*                                  | 15.29 | 163.0396<br>(2.9) | <b>119.0499</b>                            |                    |                                                         | C <sub>9</sub> H <sub>8</sub> O <sub>3</sub>    | +        | +       | +         | +            | GNPS, [3] |
| 82. | Phenolic glycoside       | (Hydroxy-dimethoxyphenyl) butenone-O-hexoside # | 15.35 | 383.1344          | 221.0817,<br><b>203.0712</b> ,<br>177.0919 |                    |                                                         | C <sub>18</sub> H <sub>24</sub> O <sub>9</sub>  | +        | +       | tr        | +++          |           |
| 83. | Chalcone                 | trimethoxy dihydro chalcone-O-hexoside          | 15.68 |                   |                                            | 479.1914<br>(-0.4) | 299.1284,<br>193.0863,<br><b>167.0704</b> ,<br>149.0599 | C <sub>24</sub> H <sub>30</sub> O <sub>10</sub> | -        | +       | tr        | +++          | [31]      |
| 84. | Cinnamyl alcohols        | Caffeoyl alcohol                                | 15.70 |                   |                                            | 167.0704<br>(-1.0) | <b>149.0601</b> ,<br>131.0495,<br>121.0651<br>103.0545  | C <sub>9</sub> H <sub>10</sub> O <sub>3</sub>   | -        | +       | -         | +++          |           |
| 85. | Iridoid glycoside        | Ligstroside                                     | 15.72 | 523.1817<br>(0.8) | <b>315.1238</b> ,<br>179.0713              |                    |                                                         | C <sub>25</sub> H <sub>32</sub> O <sub>12</sub> | -        | +       | tr        | +++          |           |
| 86. | Cinnamic acid derivative | Di-O-caffeoylquinic acid isomer III             | 15.80 | 515.118<br>(2.6)  | <b>353,335,1</b><br>91,179,17<br>3,155,137 |                    |                                                         | C <sub>25</sub> H <sub>24</sub> O <sub>12</sub> | +        | +       | +         | +            | [3]       |
| 87. | Acylated flavonoid       | Kaempferol-O-(O-                                | 15.90 | 489.1030          | 327.2175,<br>309.2068,                     | 491.1188           | <b>287.0556</b> ,<br>187.0613,                          | C <sub>23</sub> H <sub>22</sub> O <sub>12</sub> | ++       | +       | +         | tr           | [3]       |

|     | Compound Class        | name                                            | RT    | M-H            | MS <sup>2</sup>                                                    | M+H             | MS <sup>2</sup>                                                 | Formula                                         | M. nigra | M. alba | M. indica | M. macrooura | Reference |
|-----|-----------------------|-------------------------------------------------|-------|----------------|--------------------------------------------------------------------|-----------------|-----------------------------------------------------------------|-------------------------------------------------|----------|---------|-----------|--------------|-----------|
|     | glycoside             | acetylhexoside) isomer II*                      |       | (1.7)          | 285.033, <b>284.0324</b> , 255.0293, 89.0240                       | (-0.7)          | 109.0285                                                        |                                                 |          |         |           |              |           |
| 88. | Coumarin              | hydroxycoumarin*                                | 16.32 |                |                                                                    | 163.0391 (-0.7) | 148.0512, 135.0445, 119.0493 <b>107.0494</b> , 91.0544, 79.0542 | C <sub>9</sub> H <sub>6</sub> O <sub>3</sub>    | +        | +       | +         | +++          | [10]      |
| 89. | Cinnamyl alcohol      | Coniferyl alcohol*                              | 16.34 |                |                                                                    | 181.0861 (-0.7) | <b>163.0755</b> , <b>105.0701</b>                               | C <sub>10</sub> H <sub>12</sub> O <sub>3</sub>  | +        | tr      | tr        | +++          | [32]      |
| 90. | Flavonoid glycoside   | Methoxyhydroxyethyl-hydroxyflavane-O-hexoside * | 16.38 | 477.1764 (0.4) | <b>315.1235</b> , 193.0868, 135.0452                               |                 |                                                                 | C <sub>24</sub> H <sub>30</sub> O <sub>10</sub> | +++      | +       | ++        | +++          | [33]      |
| 91. | Prenylated flavonoids | Preglabridin-O-hexoside                         | 16.83 | 487.1971 (0.6) | 343.2134, 325.1452, 243.1230, <b>203.1078</b> , 189.0918, 135.0451 |                 |                                                                 | C <sub>26</sub> H <sub>32</sub> O <sub>9</sub>  | -        | tr      | tr        | +            |           |
| 92. | Terpene               | Loliolide*                                      | 16.93 |                |                                                                    | 197.1174        | 179.1071, 161.0965,                                             | C <sub>11</sub> H <sub>16</sub> O <sub>3</sub>  | +        |         |           |              | [32]      |



|     | Compound Class           | name                          | RT    | M-H                | MS <sup>2</sup>                                                      | M+H                | MS <sup>2</sup>                         | Formula                                         | <i>M. nigra</i> | <i>M. alba</i> | <i>M. indica</i> | <i>M. macroura</i> | Reference  |
|-----|--------------------------|-------------------------------|-------|--------------------|----------------------------------------------------------------------|--------------------|-----------------------------------------|-------------------------------------------------|-----------------|----------------|------------------|--------------------|------------|
|     | lactone                  |                               |       |                    |                                                                      | (-0.8)             | <b>133.1015</b> ,<br>107.0857           |                                                 |                 |                |                  |                    |            |
| 93. | Cinnamic acid derivative | Methyl caffeate*              | 17.71 | 193.0507<br>(-0.3) | 161.0242,<br><b>134.0373</b>                                         |                    |                                         | C <sub>10</sub> H <sub>10</sub> O <sub>4</sub>  | ++              | +              | +                | ++                 | GNPS, [34] |
| 94. | Benzoic acid derivatives | Vanillyl vanillate-O-hexoside | 17.81 | 465.1401<br>(0.2)  | <b>257.0818</b> ,<br>242.0587                                        |                    |                                         | C <sub>22</sub> H <sub>26</sub> O <sub>11</sub> | tr              | tr             | +                | +++                | [35]       |
| 95. | Lignan                   | Lanicepside A                 | 18.11 | 537.1974<br>(0.6)  | 480.3102,<br><b>329.1396</b> ,<br>255.2326,<br>193.0870,<br>149.0607 |                    |                                         | C <sub>36</sub> H <sub>34</sub> O <sub>12</sub> | tr              | tr             | +                | +++                | [36]       |
| 96. | Aryl-benzofuran          | Moracin M*                    | 18.19 | 241.0508<br>(-0.5) | 199.0400,<br>157.0296                                                |                    |                                         | C <sub>14</sub> H <sub>10</sub> O <sub>4</sub>  | +               | +              | +++              | +++                | [37]       |
| 97. | Flavonoid                | Tetrahydroxy flavone *        | 18.37 | 285.0404<br>(0.3)  | 267.0291,<br>241.0504,<br>151.0036,<br>125.024                       | 287.0554<br>(-1.2) | <b>153.0185</b> ,<br>135.0441           | C <sub>15</sub> H <sub>10</sub> O <sub>6</sub>  | +               | +              | +                | +                  | GNPS, [38] |
| 98. | Fatty acid               | 8-oxononanoate (isomer 1)     | 18.73 |                    |                                                                      | 173.1175<br>(-1.4) | 109.1012,<br>81.0699,<br><b>67.0542</b> | C <sub>9</sub> H <sub>16</sub> O <sub>3</sub>   | ++              | ++             | ++               | +                  |            |
| 99. | Benzoic acid             | Hydroxybenzoic                | 18.77 | 137.0243           | <b>93.0347</b>                                                       | -                  | -                                       | C <sub>7</sub> H <sub>6</sub> O <sub>3</sub>    | +               | +              | +                | +                  | GNPS       |

|      | Compound Class                | name                                  | RT    | M-H             | MS <sup>2</sup>                                 | M+H            | MS <sup>2</sup>                                        | Formula                                          | M. nigra | M. alba | M. indica | M. macrooura | Reference |
|------|-------------------------------|---------------------------------------|-------|-----------------|-------------------------------------------------|----------------|--------------------------------------------------------|--------------------------------------------------|----------|---------|-----------|--------------|-----------|
|      |                               | acid                                  |       | (1.2)           |                                                 |                |                                                        |                                                  |          |         |           |              |           |
| 100. | Megastigmane                  | Megastigmatrine *                     | 19.69 |                 |                                                 | 191.1435 (1.1) | 173.1317, 135.0803, 109.1013, 91.0544, 81.0696, 67.054 | C <sub>13</sub> H <sub>18</sub> O                | +        | -       | +         | +            | [39]      |
| 101. | Cinnamic acid derivative      | Salvianolic acid F                    | 19.97 | 313.0711 (2.3)  | <b>295.0611</b> , 179.0348                      |                |                                                        | C <sub>17</sub> H <sub>14</sub> O <sub>6</sub>   | -        | tr      | tr        | +++          | [25]      |
| 102. | Flavonoids                    | methoxy-hydroxyethyl-dihydroxyflavone | 21.18 | 315.1242 (-1.2) | 193.068, 175.0768, <b>135.0452</b> , 109.0297   |                |                                                        | C <sub>18</sub> H <sub>20</sub> O <sub>5</sub>   | +        | tr      | -         | +++          | [40]      |
| 103. | Chalcone                      | Trihydroxy methoxy chalcone           | 22.11 | 285.0767 (0.5)  | <b>270.053</b> , 255.0294, 227.035              |                |                                                        | C <sub>16</sub> H <sub>14</sub> O <sub>5</sub>   | tr       | tr      | +++       | tr           | [41]      |
| 104. | Chalcone                      | Trihydroxychalcone                    | 22.39 | 255.0663 (-0.1) | <b>240.0426</b> , 212.0479, 196.0524            |                |                                                        | C <sub>15</sub> H <sub>12</sub> O <sub>4</sub>   | tr       | tr      | +++       | tr           |           |
| 105. | Sulfated prenylated flavonoid | O-Methylpreglabridin-O-sulphate #     | 22.96 | 419.117         | 339.1599, 269.0486, 203.1078, <b>189.0919</b> , |                |                                                        | C <sub>21</sub> H <sub>24</sub> O <sub>7</sub> S | -        | ++      | +         | +++          |           |

|      | Compound Class       | name                | RT    | M-H                | MS <sup>2</sup>                                         | M+H                | MS <sup>2</sup>                                                                        | Formula                                        | M. nigra | M. alba | M. indica | M. macrooura | Reference |
|------|----------------------|---------------------|-------|--------------------|---------------------------------------------------------|--------------------|----------------------------------------------------------------------------------------|------------------------------------------------|----------|---------|-----------|--------------|-----------|
|      |                      |                     |       |                    | 177.092,<br>149.0608                                    |                    |                                                                                        |                                                |          |         |           |              |           |
| 106. | Prenylated flavonoid | Morusyunnansi n F*  | 23.47 | 325.1446<br>(-0.2) | <b>203.1080</b> ,<br>189.0920,<br>177.0923,<br>135.0451 |                    |                                                                                        | C <sub>20</sub> H <sub>22</sub> O <sub>4</sub> | tr       | +       | ++        | +++          | [42]      |
| 107. | Prenylated flavonoid | Artocarpesin *      | 24.40 | 353.1033<br>(-0.6) | 335.0926,<br><b>283.0607</b> ,<br>219.0663,<br>149.0245 |                    |                                                                                        | C <sub>20</sub> H <sub>18</sub> O <sub>6</sub> | -        | tr      | tr        | +++          | [43]      |
| 108. | Flavonoid            | Hexamethoxy flavone | 24.74 |                    |                                                         | 403.1392<br>(-1.2) | 388.1164,<br><b>373.0929</b>                                                           | C <sub>21</sub> H <sub>22</sub> O <sub>8</sub> | +++      | +       | -         | +++          | GNPS      |
| 109. | Flavonoid            | Tetramethoxyflavone | 25.02 | -                  |                                                         | 343.1181<br>(-1.5) | 328.0945,<br><b>313.0718</b> ,<br>299.0919,<br>282.0887                                | C <sub>19</sub> H <sub>18</sub> O <sub>6</sub> | +++      | +       | +         | +++          | GNPS      |
| 110. | Glycerolipid         | Glyceryl Palmitate  | 26.62 |                    |                                                         | 331.2845<br>(-0.7) | 313.2744,<br>299.1624,<br>257.2486,<br>239.2369,<br>137.1325,<br>123.117,<br>109.1013, | C <sub>19</sub> H <sub>38</sub> O <sub>4</sub> | +++      | ++      | -         | -            |           |

|      | Compound Class       | name                       | RT    | M-H            | MS <sup>2</sup>                                         | M+H             | MS <sup>2</sup>                                                                                              | Formula                                        | M. nigra | M. alba | M. indica | M. macrooura | Reference |
|------|----------------------|----------------------------|-------|----------------|---------------------------------------------------------|-----------------|--------------------------------------------------------------------------------------------------------------|------------------------------------------------|----------|---------|-----------|--------------|-----------|
|      |                      |                            |       |                |                                                         |                 | 95.0855,<br>85.1013,<br><b>71.0856</b>                                                                       |                                                |          |         |           |              |           |
| 111. | Chalcone             | Dihydroxy methoxy chalcone | 26.47 | 269.0819 (0.1) | <b>254.0583</b> ,<br>239.0351,<br>226.0623,<br>211.0399 |                 |                                                                                                              | C <sub>16</sub> H <sub>14</sub> O <sub>4</sub> | tr       | tr      | +++       | tr           | [44]      |
| 112. | Flavonoid            | Pentamethoxyflavone        | 26.41 |                |                                                         | 373.1286 (-1.1) | 358.1045,<br><b>343.0813</b> ,<br>325.0705                                                                   | C <sub>20</sub> H <sub>20</sub> O <sub>7</sub> | +++      | -       | +         | +++          | GNPS      |
| 113. | Prenylated flavonoid | Mulberrin * (Kuwanon C)    | 26.49 | 421.1652 (1.2) | 352.0952,<br><b>299.1290</b> ,<br>109.0295              |                 |                                                                                                              | C <sub>25</sub> H <sub>26</sub> O <sub>6</sub> | tr       | +       | +++       | -            | [13],     |
| 114. | Aryl-benzofuran      | Artoindonesianin O*        | 26.93 | 323.1289       | 265.0525,<br>201.0935,<br><b>135.0457</b>               |                 |                                                                                                              | C <sub>20</sub> H <sub>20</sub> O <sub>4</sub> | tr       | +       | +         | ++           | [34]      |
| 115. | Glycerolipid         | Monolinolenin              | 27.14 |                |                                                         | 353.2691 (-1.2) | <b>261.2213</b> ,<br>243.2104,<br>187.1477,<br>173.1334,<br>149.1333,<br>135.1168,<br>121.1013,<br>107.0855, | C <sub>21</sub> H <sub>36</sub> O <sub>4</sub> | +        | +       | +         | +            | GNPS      |

|      | Compound Class       | name                            | RT    | M-H             | MS <sup>2</sup>                                        | M+H             | MS <sup>2</sup>                                                                                                                                                                      | Formula                                                       | <i>M. nigra</i> | <i>M. alba</i> | <i>M. indica</i> | <i>M. macroura</i> | Reference  |
|------|----------------------|---------------------------------|-------|-----------------|--------------------------------------------------------|-----------------|--------------------------------------------------------------------------------------------------------------------------------------------------------------------------------------|---------------------------------------------------------------|-----------------|----------------|------------------|--------------------|------------|
|      |                      |                                 |       |                 |                                                        |                 | 95.0855,<br>81.0699,<br>67.0543                                                                                                                                                      |                                                               |                 |                |                  |                    |            |
| 116. | Prenylated flavonoid | Dihydroxymethoxyl-prenylflavan* | 27.32 | 339.1604 (-0.6) | 215.1078,<br><b>203.1079</b> ,<br>177.0924,<br>149.061 |                 |                                                                                                                                                                                      | C <sub>21</sub> H <sub>24</sub> O <sub>4</sub>                | tr              | ++             | +                | +++                | [10]       |
| 117. | Fatty acid amide     | <i>N</i> -palmitoyl lysine      | 27.4  |                 |                                                        | 385.3426 (-0.4) | 345.2034,<br>310.3109,<br>292.3016,<br>268.3,<br>261.2215,<br>243.2113,<br>219.1721,<br>187.1479,<br>163.1491,<br>149.1325,<br>123.117,<br>109.101,<br>95.0856,<br>81.07,<br>60.0442 | C <sub>22</sub> H <sub>44</sub> N <sub>2</sub> O <sub>3</sub> | +               | +              | +                | +                  |            |
| 118. | Prenylated flavonoid | (Iso)bavachin                   | 27.80 | 323.1287 (0.6)  | 293.1756,<br><b>203.0717</b> ,<br><b>119.0499</b>      |                 |                                                                                                                                                                                      | C <sub>20</sub> H <sub>20</sub> O <sub>4</sub>                | +               | ++             | ++               | +                  | [45], GNPS |

|      | Compound Class       | name                                  | RT    | M-H             | MS <sup>2</sup>                                | M+H             | MS <sup>2</sup>                                  | Formula                                           | M. nigra | M. alba | M. indica | M. macrooura | Reference |
|------|----------------------|---------------------------------------|-------|-----------------|------------------------------------------------|-----------------|--------------------------------------------------|---------------------------------------------------|----------|---------|-----------|--------------|-----------|
| 119. | phospholipid         | Linoleoyl-sn-glycero-3-phosphocholine | 27.87 |                 |                                                | 520.3401 (2.0)  | 502.3301, 337.2747, 258.1107, 184.0737, 104.1071 | C <sub>26</sub> H <sub>50</sub> NO <sub>7</sub> P | +++      | -       | -         | -            | GNPS, [7] |
| 120. | Prenylated flavonoid | Prenylapigenin                        | 27.88 | 337.1082 (-0.3) | <b>203.0715</b> , 133.0293                     |                 |                                                  | C <sub>20</sub> H <sub>18</sub> O <sub>5</sub>    | tr       | -       | tr        | +++          |           |
| 121. | Aryl-benzofuran      | Mulberrofuran U*                      | 28.45 | 647.2290 (-0.6) | 469.1286, <b>359.0927</b> , 227.0721, 177.0924 |                 |                                                  | C <sub>39</sub> H <sub>36</sub> O <sub>9</sub>    | tr       | +++     | tr        | +++          | [46]      |
| 122. | Phospholipid         | 2-palmitoyllysophosphatidylcholine    | 31.42 |                 |                                                | 496.3402 (-0.8) | 478.3294, 313.2743, 184.0736, 104.1072           | C <sub>24</sub> H <sub>51</sub> NO <sub>7</sub> P | +++      | -       | +         | -            | GNPS, [7] |

## References

1. Asano, N., et al., *N-containing sugars from Morus alba and their glycosidase inhibitory activities*. Carbohydrate research, 1994. **259**(2): p. 243-255.
2. Nojima, H., et al., *Antihyperglycemic effects of N-containing sugars from Xanthocercis zambesiaca, Morus bombycis, Aglaonema treubii, and Castanospermum australe in streptozotocin-diabetic mice*. Journal of Natural Products, 1998. **61**(3): p. 397-400.
3. Mena, P., et al., *Phytochemical evaluation of eight white (Morus alba L.) and black (Morus nigra L.) mulberry clones grown in Spain based on UHPLC-ESI-MSn metabolomic profiles*. Food research international, 2016. **89**: p. 1116-1122.
4. Fushiya, S., et al., *New opine type amino acids from a poisonous mushroom, Clitocybe acromelalga*. Tetrahedron, 1996. **52**(3): p. 877-886.
5. Naznin, M., et al., *Metabolite profiling of Nymphaea rubra (Burm. f.) flower extracts using cyclic ion mobility–mass spectrometry and their associated biological activities*. Food Chemistry, 2023. **404**: p. 134544.
6. Winekenstädde, D., et al., *Phytochemical profile of the aerial parts of Sedum sediforme and anti-inflammatory activity of myricitrin*. Natural Product Communications, 2015. **10**(1): p. 1934578X1501000122.
7. Hegazi, N.M., et al., *Molecular networking leveraging the secondary metabolomes space of Halophila stipulacea (Forsk.) Aschers. and Thalassia hemprichii (Ehrenb. ex Solms) Asch. in tandem with their chemosystematics and antidiabetic potentials*. 2021. **19**(5): p. 279.
8. Ragheb, A.Y., et al., *MS/MS-based molecular networking for mapping the chemical diversity of the pulp and peel extracts from Citrus japonica Thunb.; in vivo evaluation of their anti-inflammatory and anti-ulcer potential*. Scientific African, 2023: p. e01672.
9. Li, J.L., et al., *PPAR-γ agonistic metabolites from the ascidian Herdmania momus*. Journal of natural products, 2012. **75**(12): p. 2082-2087.
10. Doi, K., et al., *Studies on the constituents of the leaves of Morus alba L.* Chemical and pharmaceutical bulletin, 2001. **49**(2): p. 151-153.
11. Kanchanapoom, T., H. Otsuka, and S. Ruchirawat, *Megastigmane glucosides from Equisetum debile and E. diffusum*. Chemical and Pharmaceutical Bulletin, 2007. **55**(8): p. 1277-1280.
12. Kim, S.Y., et al., *Two flavonoids from the leaves of Mours alba induce differentiation of the human promyelocytic leukemia (HL-60) cell line*. 2000. **23**(4): p. 451-455.
13. Zhou, Q.Y.-J., et al., *LC-MS Metabolite Profiling and the Hypoglycemic Activity of Morus alba L. Extracts*. 2022. **27**(17): p. 5360.
14. Sánchez-Salcedo, E.M., et al., *(Poly) phenolic fingerprint and chemometric analysis of white (Morus alba L.) and black (Morus nigra L.) mulberry leaves by using a non-targeted UHPLC–MS approach*. Food chemistry, 2016. **212**: p. 250-255.
15. Ju, W.-T., et al., *Qualitative and quantitative analysis of flavonoids from 12 species of Korean mulberry leaves*. Journal of food science and Technology, 2018. **55**(5): p. 1789-1796.
16. Lu, M., et al., *Comparative chemical profiling of three TCM drugs in the Paeoniaceae family by UPLC-MS/MS combined with chemometric methods*. Biochemical Systematics and Ecology, 2019. **83**: p. 121-129.
17. Piao, S.J., et al., *New stilbene, benzofuran, and coumarin glycosides from Morus alba*. 2009. **92**(3): p. 579-587.
18. Mohammadi, M. and N. Kharazian, *Untargeted metabolomics study and identification of potential biomarkers in the six sections of the genus Stachys L.(Lamiaceae) using HPLC-MQ-API-MS/MS*. Phytochemical Analysis, 2022. **33**(6): p. 915-942.
19. Susanna, D., R.M. Balakrishnan, and J.P. Ettiyanappan, *Comprehensive insight into the extract optimization, phytochemical profiling, and biological evaluation of the medicinal plant Nothapodytes foetida*. Biocatalysis and Agricultural Biotechnology, 2022. **42**: p. 102365.
20. Dey, P.K., A. Goswami, and A. Mitra, *A new targeted approach of postharvest accumulation of anthocyanin in fragrant leaves of Melissa officinalis L.* Industrial Crops and Products, 2023. **196**: p. 116479.
21. Zhong, Y.-M., et al., *Rapid analysis and identification of the main constituents in Patrinia scabiosaefolia Fisch. by UPLC/Q-TOF-MS/MS*. Acta Chromatographica, 2017. **29**(2): p. 267-277.
22. Zhang, L.-Q., et al., *Two new flavonoid glycosides isolated from the fruits of Catalpa ovata*. Pharmacognosy Magazine, 2020. **16**(72).

23. Pawlowska, A.M., et al., *Quali-quantitative analyses of flavonoids of Morus nigra L. and Morus alba L. (Moraceae) fruits*. 2008. **56**(9): p. 3377-3380.
24. Cheng, C., et al., *A new isoflavonoid from the rhizomes of Cyperus rotundus*. Asian Journal of Chemistry, 2014. **26**(13): p. 3967-3970.
25. Wang, S., et al., *Integration of LC/MS-based molecular networking and molecular docking allows in-depth annotation and prediction of the metabolome: A study of Salvia miltiorrhiza Bunge*. Industrial Crops and Products, 2022. **186**: p. 115298.
26. Boyer, L., et al., *Lignans and secoiridoids from the root bark of Chionanthus virginicus L.: isolation, identification and HPLC analysis*. Phytochemical Analysis: An International Journal of Plant Chemical and Biochemical Techniques, 2005. **16**(5): p. 375-379.
27. Li, C., et al., *A novel strategy by integrating chemical profiling, molecular networking, chemical isolation, and activity evaluation to target isolation of potential anti-ACE2 candidates in Forsythiae Fructus*. Phytomedicine, 2022. **96**: p. 153888.
28. Matsunami, K., et al., *Absolute configuration of (+)-pinoresinol 4-O-[6"-O-galloyl]- $\beta$ -D-glucopyranoside, macarangiosides E, and F isolated from the leaves of Macaranga tanarius*. Phytochemistry, 2009. **70**(10): p. 1277-1285.
29. Tanaka, Y., et al., *New chromanone and acylphloroglucinol glycosides from the bracts of hops*. 2012. **5**(3): p. 514-518.
30. Hegazi, N.M., et al., *Authentication of saffron spice accessions from its common substitutes via a multiplex approach of UV/VIS fingerprints and UPLC/MS using molecular networking and chemometrics*. 2022. **367**: p. 130739.
31. Tan, H., et al., *Antioxidant and LC-QToF-MS/MS analysis of polyphenols in polar and non-polar extracts from Strobilanthes crispus and Clinacanthus nutans*. International Food Research Journal, 2020. **27**(5).
32. Hunyadi, A., et al., *In vitro anti-diabetic activity and chemical characterization of an apolar fraction of Morus alba leaf water extract*. Phytotherapy Research, 2013. **27**(6): p. 847-851.
33. Han, W.-L., et al., *Three new flavane glucosides from the leaves of Morus wittiorum*. Journal of Asian natural products research, 2010. **12**(8): p. 680-684.
34. Wang, Y., et al., *Chemical components of the fruits of Morus nigra Linn.: Methyl caffeate as a potential anticancer agent by targeting 3-phosphoglycerate dehydrogenase*. Journal of Agricultural and Food Chemistry, 2021. **69**(42): p. 12433-12444.
35. Zhang, A.-L., et al., *Phenolic and Triterpene Glycosides from the Stems of Ilex litchaeifolia*. Journal of natural products, 2005. **68**(10): p. 1531-1535.
36. Wu, R., et al., *Rapid characterization of chemical constituents and metabolites of Qi-Jing-Sheng-Bai granule by using UHPLC-Q-TOF-MS*. Journal of Separation Science, 2018. **41**(9): p. 1960-1972.
37. Rivière, C., et al., *Polyphenols from the stems of Morus alba and their inhibitory activity against nitric oxide production by lipopolysaccharide-activated microglia*. Fitoterapia, 2014. **97**: p. 253-260.
38. Jeong, S.H., et al., *Tyrosinase inhibitory polyphenols from roots of Morus lhou*. Journal of agricultural and food chemistry, 2009. **57**(4): p. 1195-1203.
39. Fadil, H.A.E., et al., *The palliative effect of mulberry leaf and olive leaf ethanolic extracts on hepatic CYP2E1 and caspase-3 immunoexpression and oxidative damage induced by paracetamol in male rats*. Environmental Science and Pollution Research, 2023: p. 1-18.
40. Zhang, H.-R., et al., *Antioxidant flavan derivatives from the leaves of Morus alba*. Phytochemistry Letters, 2019. **29**: p. 84-90.
41. Mativandlela, S.P., et al., *Antimycobacterial flavonoids from the leaf extract of Galenia africana*. Journal of natural products, 2009. **72**(12): p. 2169-2171.
42. Kim, J.Y., et al., *Chemical profiles and hypoglycemic activities of mulberry leaf extracts vary with ethanol concentration*. Food Science and Biotechnology, 2013. **22**: p. 1-5.
43. Kapche, G.D., et al., *Prenylated arylbenzofuran derivatives from Morus mesozygia with antioxidant activity*. Phytochemistry, 2009. **70**(2): p. 216-221.
44. Xia, M., et al., *Characterization of Chemical Constituents of Oxytropis microphylla (Pall.) DC. by Ultra-High-Performance Liquid Chromatography Coupled with Quadrupole-Time-of Flight Tandem Mass Spectrometry*. Separations, 2022. **9**(10): p. 297.



45. Zhang, Y., et al., *A novel strategy integrating gas phase fractionation with staggered mass range and LC-MS/MS molecular network for comprehensive metabolites profiling of Gui Ling Ji in rats*. *Journal of Pharmaceutical and Biomedical Analysis*, 2023. **222**: p. 115092.
46. Choi, Y.-J., et al., *Metabolomic analysis of Morus cultivar root extracts and their ameliorative effect on testosterone-induced prostate enlargement in Sprague-Dawley rats*. *International Journal of Molecular Sciences*, 2020. **21**(4): p. 1435.
