# Supplementary material for: Molecular networking-guided investigation of the secondary metabolome of four Morus species and their in vivo neuroprotective potential for the mitigation of Alzheimer's disease
Source: Royal Society of Chemistry journal article supplement (doi:10.1039/d3fo05711a), 2024-01-01
Supplement: d3fo05711a2.pdf [file d3fo05711a2.pdf]

### Figure 5 Supplementary Information (Western blotting)

It should be noted that the protein ladder we used (Spectra™ Multicolor Broad Range Protein Ladder, Thermofisherscientific Cat. No.: 26634) could not be developed by The ECL kit (Pierce™ ECL Western Blotting Substrate Cat. No. : 32106). Therefore, these markers can only be identified by the human eye on the developed membrane and cannot be taken by the Biospectrum imager to be displayed in the obtained chemi-images.

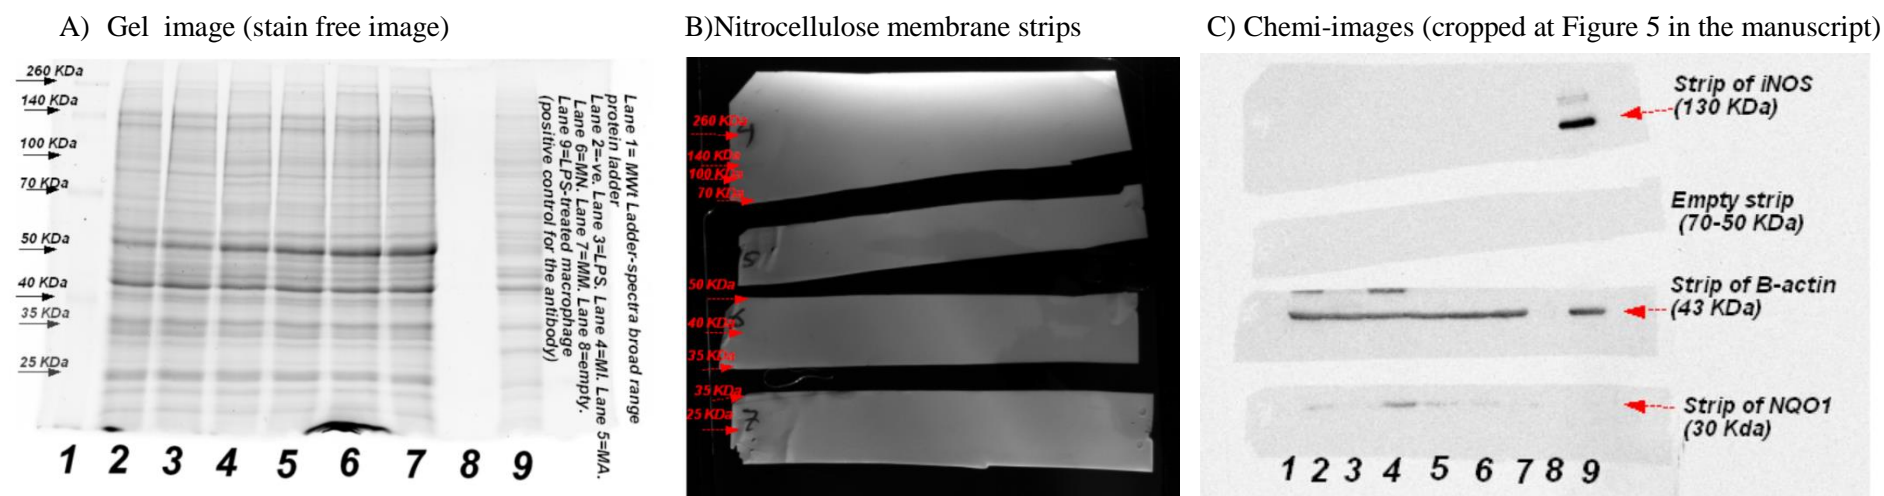

Figure A is a stain free image of the gel after electrophoresis just before assembly of the transfer. This step is a routine in our laboratory to ensure the good resolution of the protein separation. In this technique we use trichloroethanol (TCE) in the gel matrix and activate the gel for 2-5 min with UV at 302 nm before capturing photo with the Biospectrum Imager. Some of the pre-stained protein Mwt markers of the Spectra are quenched by the UV and do not normally appear in the gel (e.g 50, 35 and 25), although they are visually appearing in the gel and membrane by normal eye. Lane 1= MWt Ladder-spectra broad range protein ladder .Lane 2=-ve. Lane 3=LPS. Lane 4=MI. Lane 5=MA. Lane 6=MN. Lane 7=MM. Lane 8=empty. Lane 9=LPS-treated macrophage (positive control for the antibody)
